# Supplementary material for: Inhibitory activity of quercetin, its metabolite, and standard antiviral drugs towards enzymes essential for SARS-CoV-2: the role of acid–base equilibria
Source: PubMed Central journal article supplement (PMC8693803; doi:10.1039/d0ra09632f), 2021-01-12
Supplement: RA-011-D0RA09632F-s001.pdf [file RA-011-D0RA09632F-s001.pdf]

**Supplementary Material**

**for**

**Inhibitory activity of quercetin, its metabolite, and standard  
antiviral drugs towards enzymes essential for SARS-CoV-2: the role  
of acid-base equilibria**

**Žiko Milanović<sup>a</sup>, Marko Antonijević<sup>b</sup>, Ana Amić<sup>c</sup>, Edina Avdović<sup>b</sup>, Dušan Dimić<sup>d</sup>, Dejan  
Milenković<sup>b</sup>, Zoran Marković<sup>b\*</sup>**

*<sup>a</sup>University of Kragujevac, Faculty of Science, Department of Chemistry, Radoja Domanovića  
12, 34000 Kragujevac, Serbia*

*<sup>b</sup>University of Kragujevac, Institute for Information Technologies, Department of Science,  
34000 Kragujevac, Serbia*

*<sup>c</sup>Juraj Strossmayer University of Osijek, Department of Chemistry, Ulica cara Hadrijana 8/A,  
Osijek, Croatia*

*<sup>d</sup>University of Belgrade, Faculty of Physical Chemistry, Studentski trg 12-16, 11000 Belgrade,  
Serbia*

\*Corresponding author. Tel: +381 34 370270; Fax: +381 34 370168

E-mail address: zmarkovic@uni.kg.ac.rs (Zoran Marković)

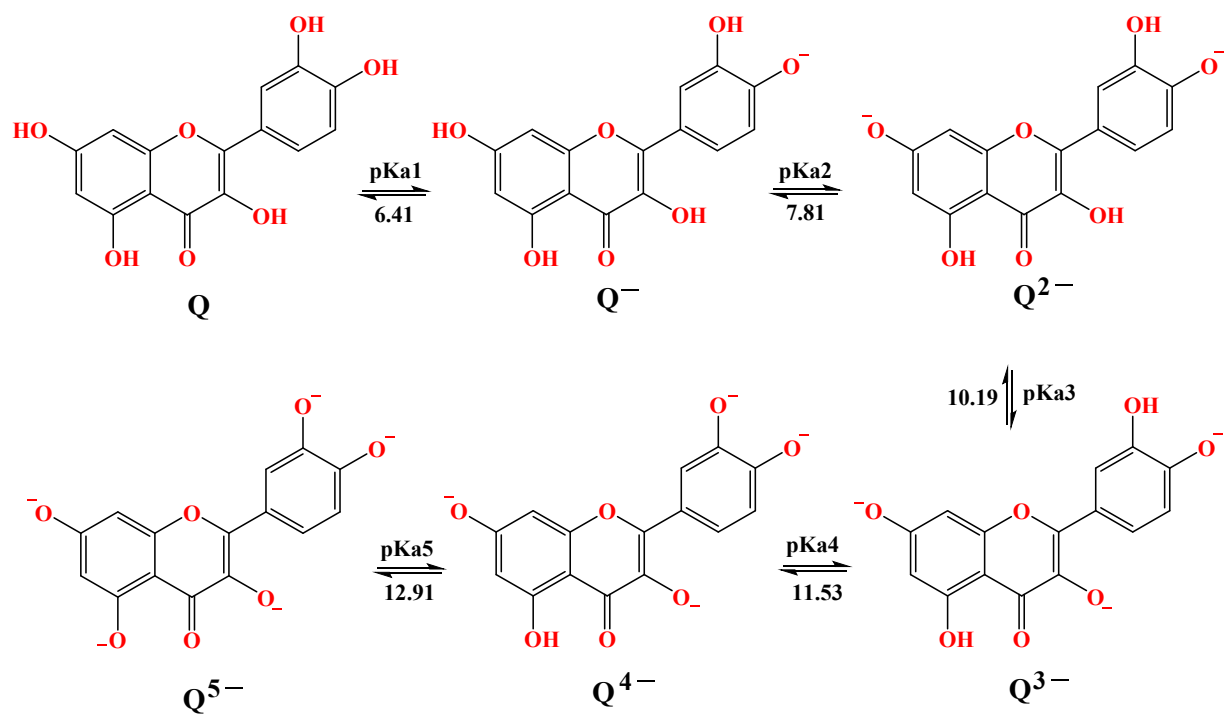

Fig. S1 Experimentally determined deprotonation process and corresponding pK<sub>a</sub> values of Q

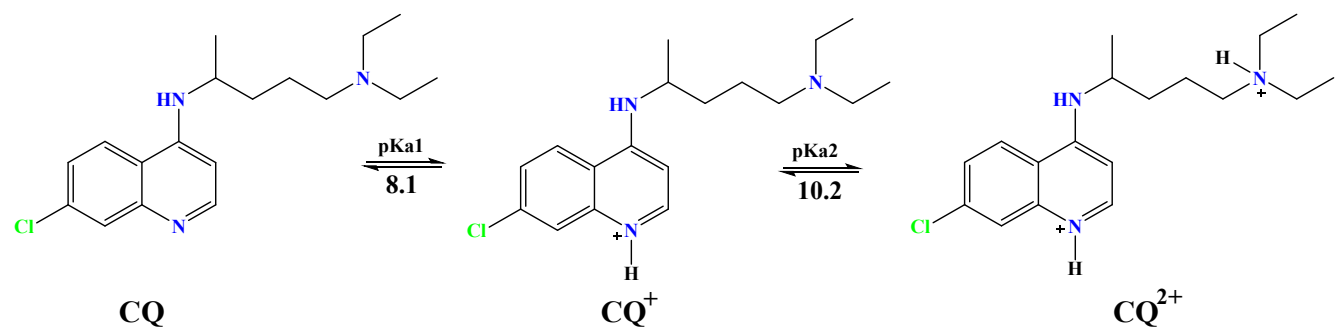

Fig. S2 Experimentally determined the protonation process and corresponding pK<sub>a</sub> values of CQ

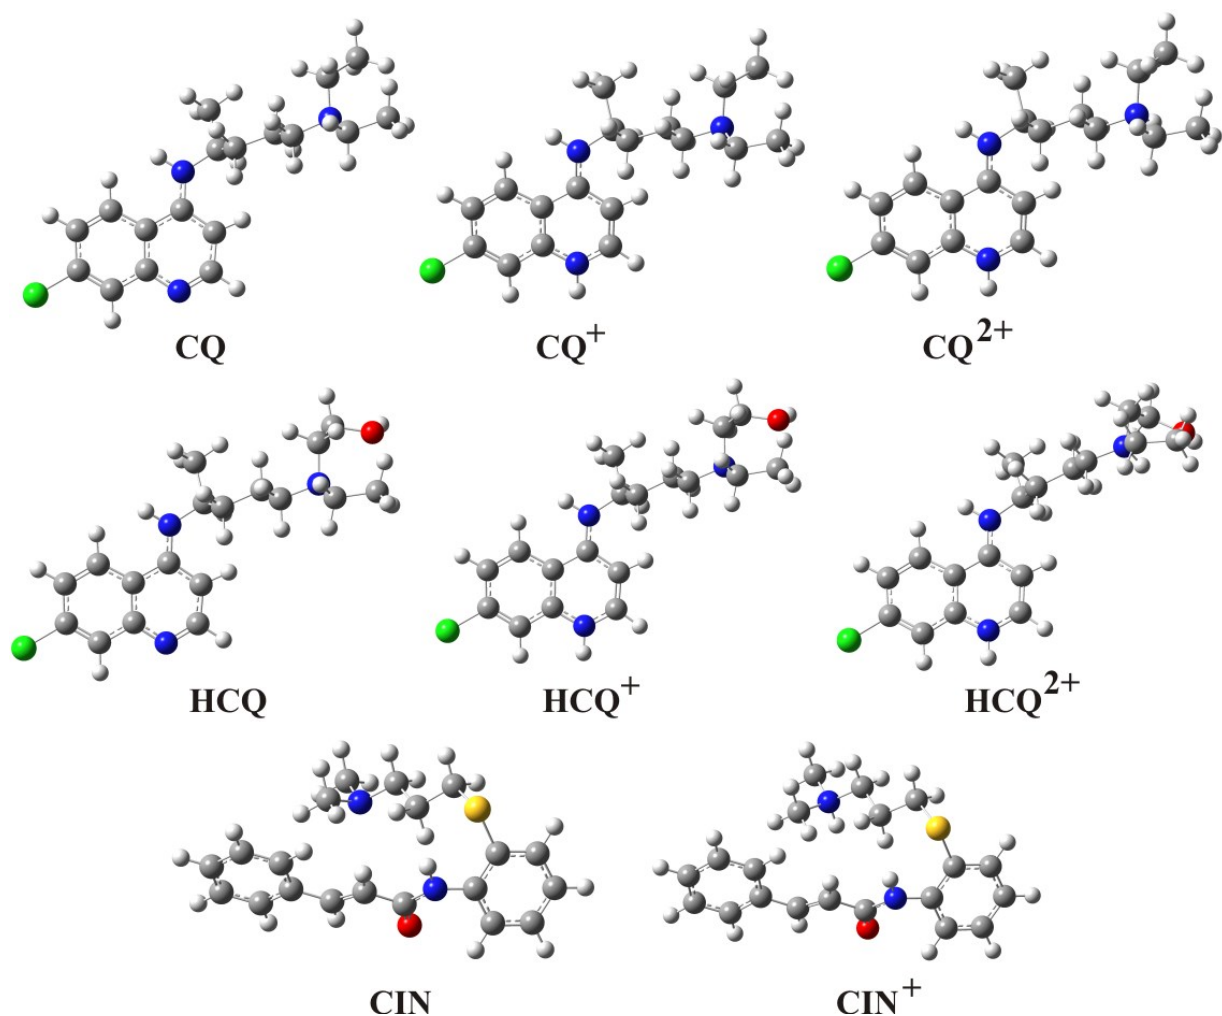

**Fig. S3** The optimized geometries of dominant acid-base forms of **CQ**, **HCQ**, and **CIN** at M06-2X/6-311++G(d,p) level of theory

**Table S1.** Predicted molar fractions ( $f$ ) of different acid-base species of investigated compounds at physiological pH

| Investigation compounds*: | <b>R</b> | <b>R<sup>-</sup></b> | <b>R<sup>2-</sup></b> | <b>R<sup>3-</sup></b> | <b>R<sup>4-</sup></b> | <b>R<sup>5-</sup></b> |
|---------------------------|----------|----------------------|-----------------------|-----------------------|-----------------------|-----------------------|
| <b>Q</b>                  | 6.67     | 66.72                | 26.56                 | 0.04                  | 0.00                  | 0.00                  |
| <b>BZF</b>                | 29.54    | 36.24                | 31.56                 | 2.75                  | 0.00                  | 0.00                  |
| Standards:                | <b>R</b> |                      | <b>R<sup>+</sup></b>  |                       | <b>R<sup>2+</sup></b> |                       |
| <b>CQ</b>                 | 0.03     |                      | 16.74                 |                       | 83.24                 |                       |
| <b>HCQ</b>                | 3.49     |                      | 87.73                 |                       | 8.77                  |                       |
| <b>CIN</b>                | 1.04     |                      | 98.86                 |                       | /                     |                       |

\*R=investigation compounds

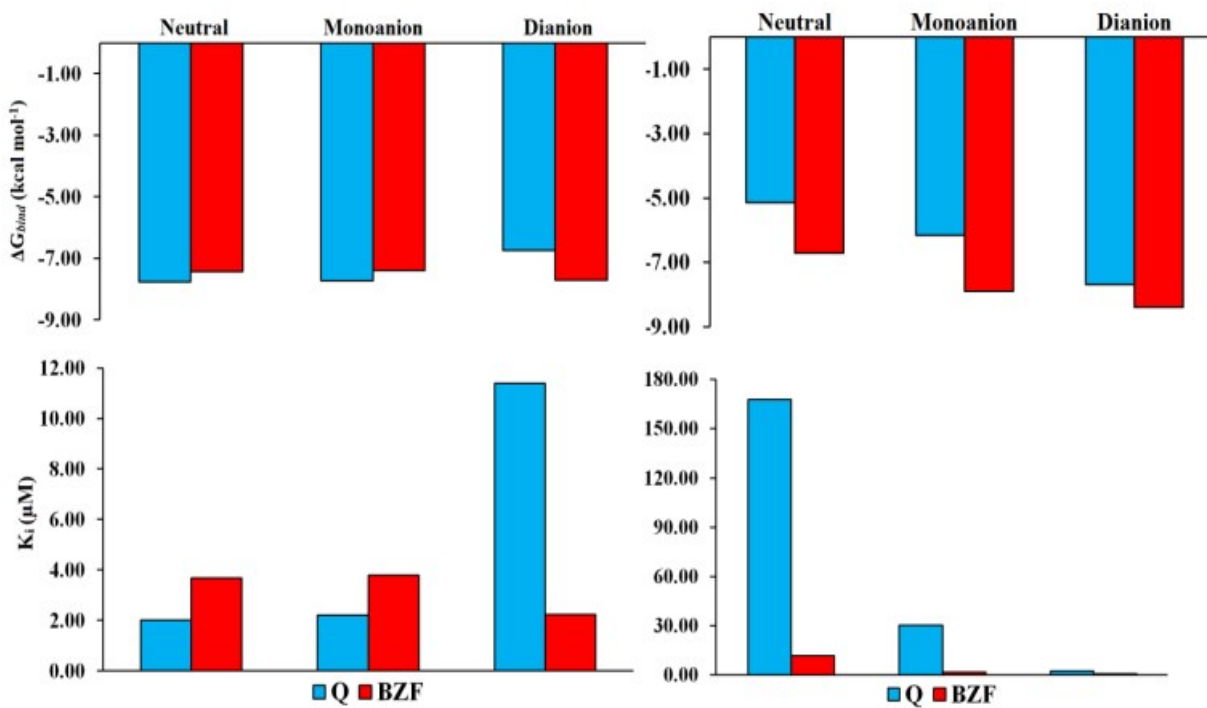

**Fig. S4** Histogram of the important thermodynamic parameters for best docking conformations of investigated acid-base forms **Q** and **BZF** with **FUR** (left) and **SP** (right).

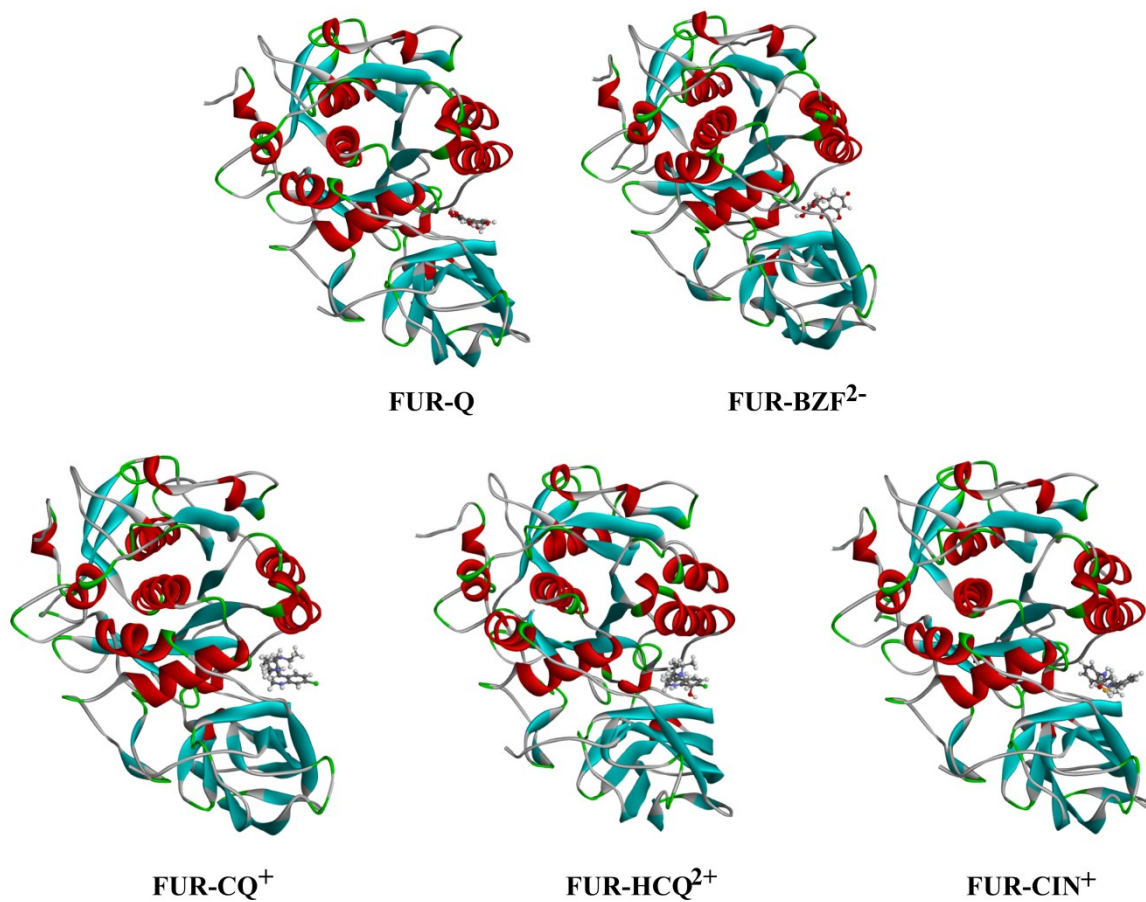

**Fig. S5.** 3D representation of the most stable FUR-ligand complexes obtained after a molecular docking study

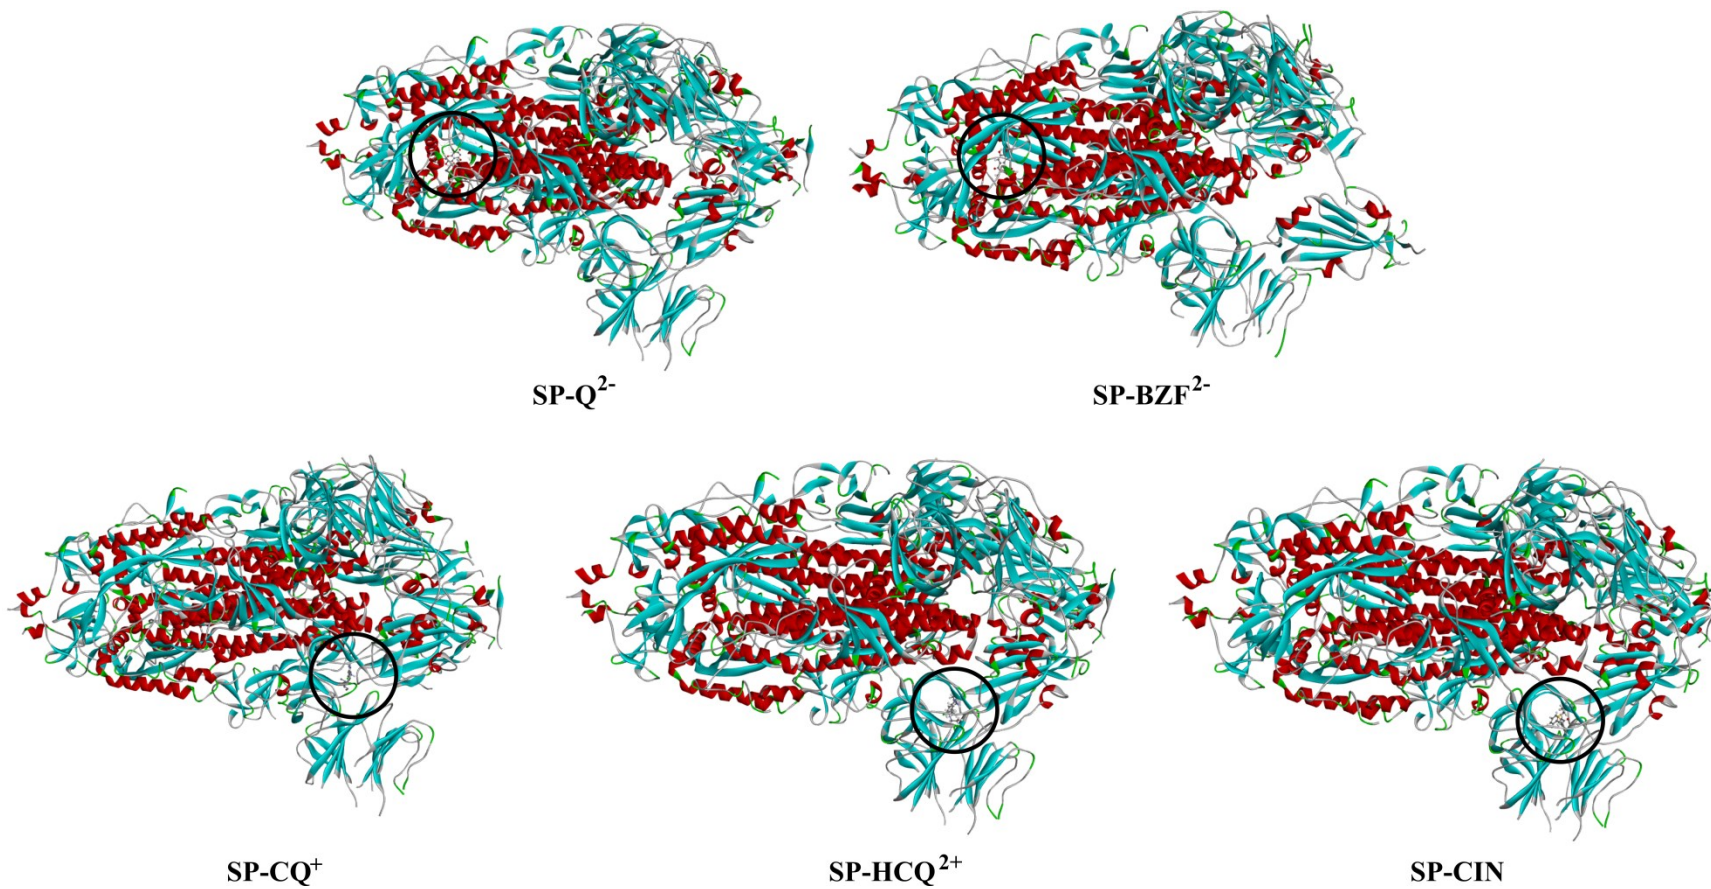

**Fig. S6.** 3D representation of the most stable SP-ligand complexes obtained after a molecular docking study (black circle-position of ligand)

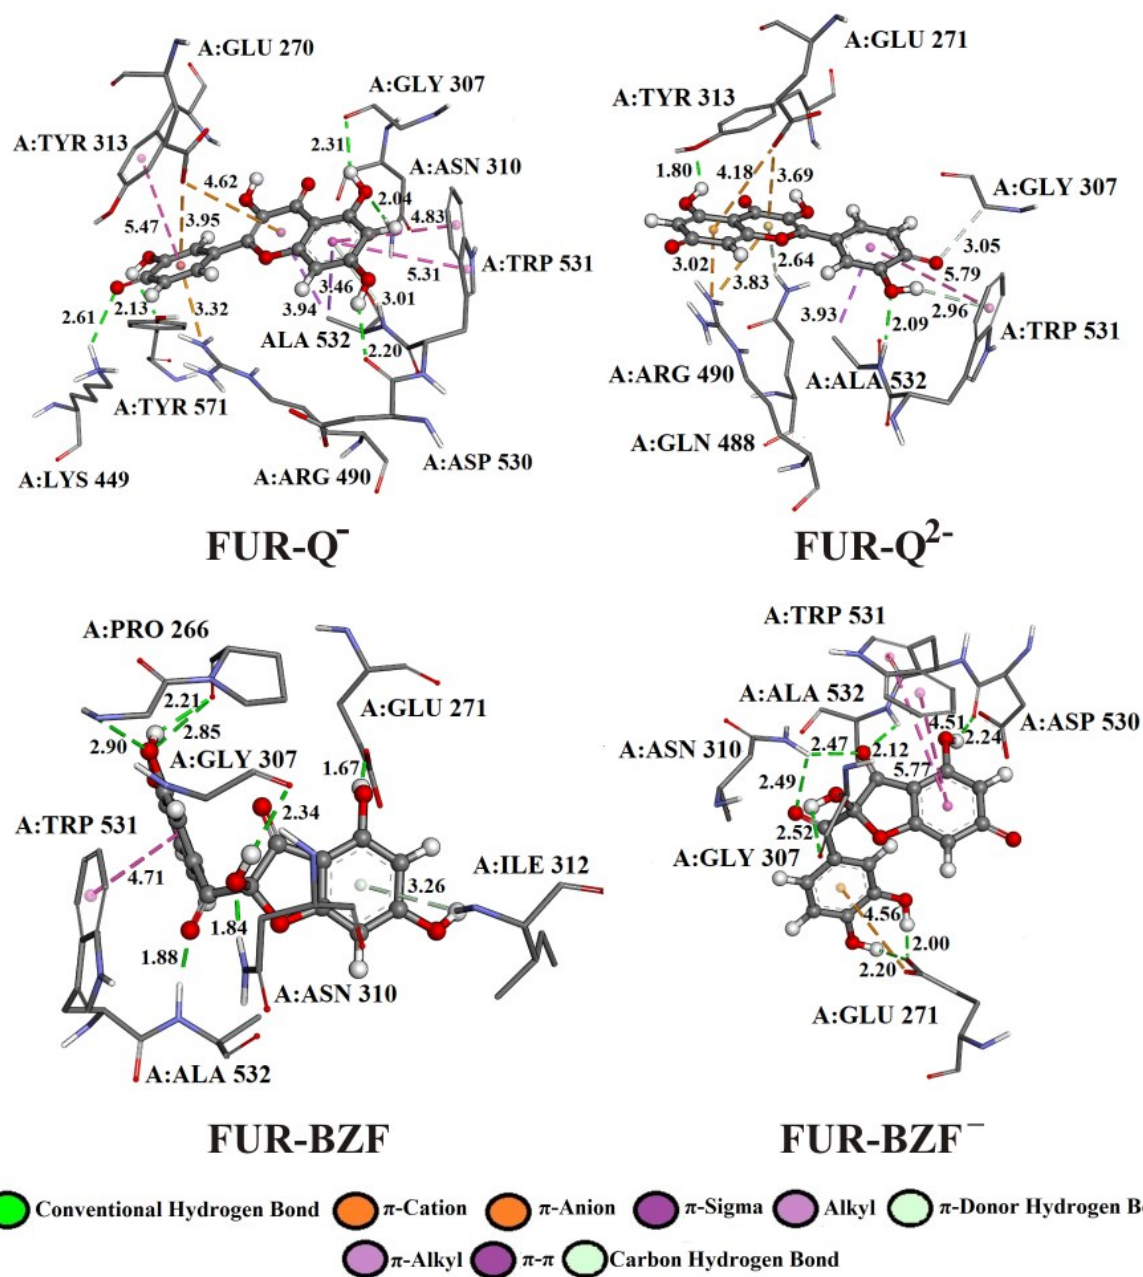

**Fig. S7** The best docking positions of different acid-base forms of **Q** and **BZF** to **FUR** enzyme

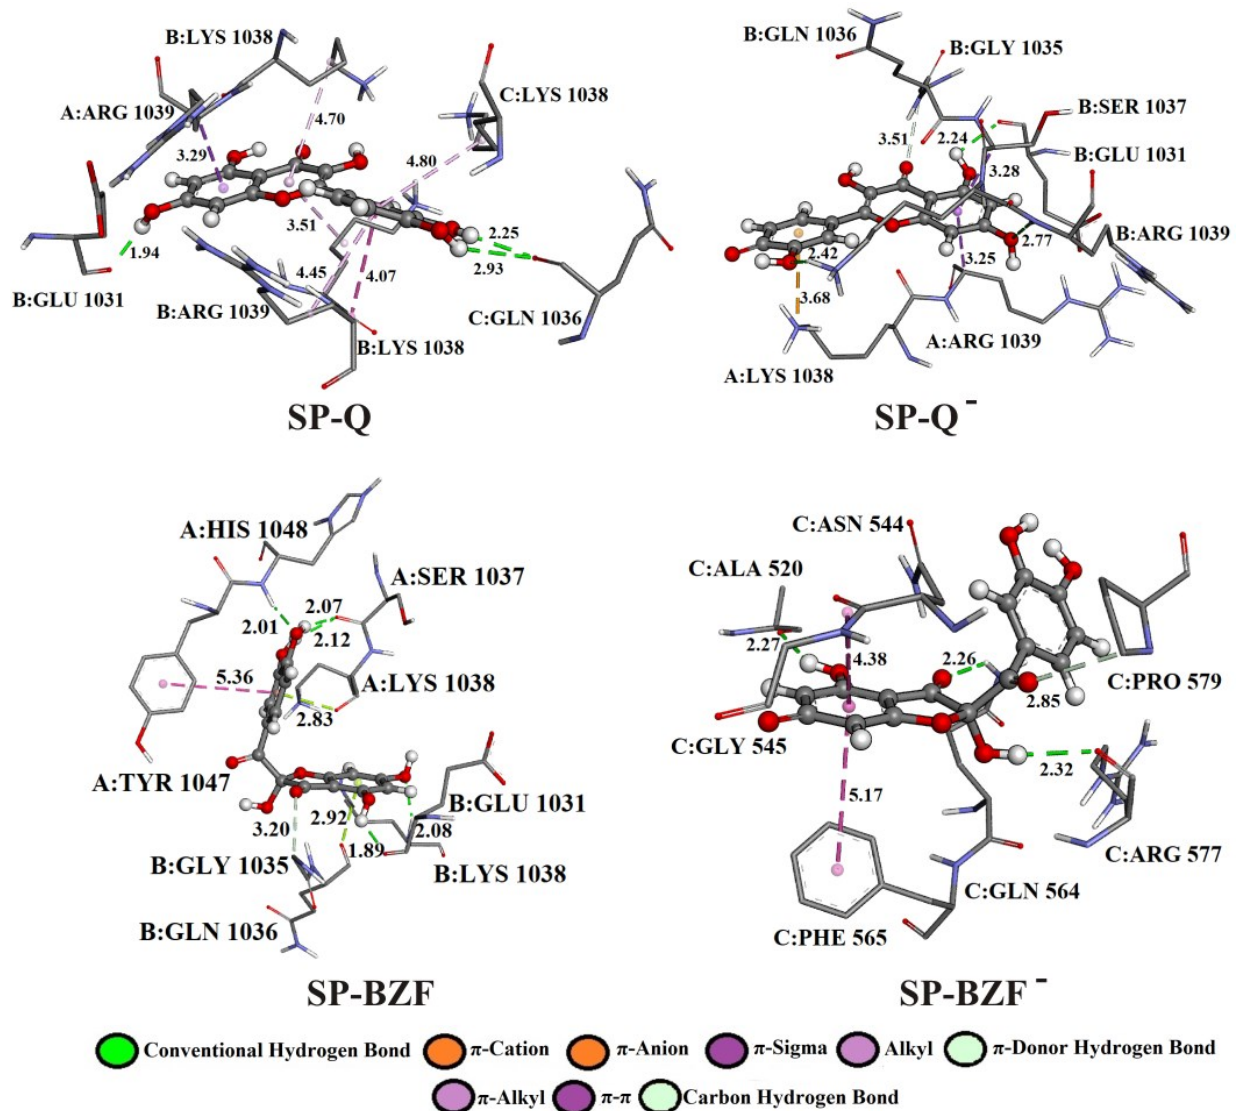

**Fig. S8** The best docking positions of different acid-base forms of **Q** and **BZF** to **SP**



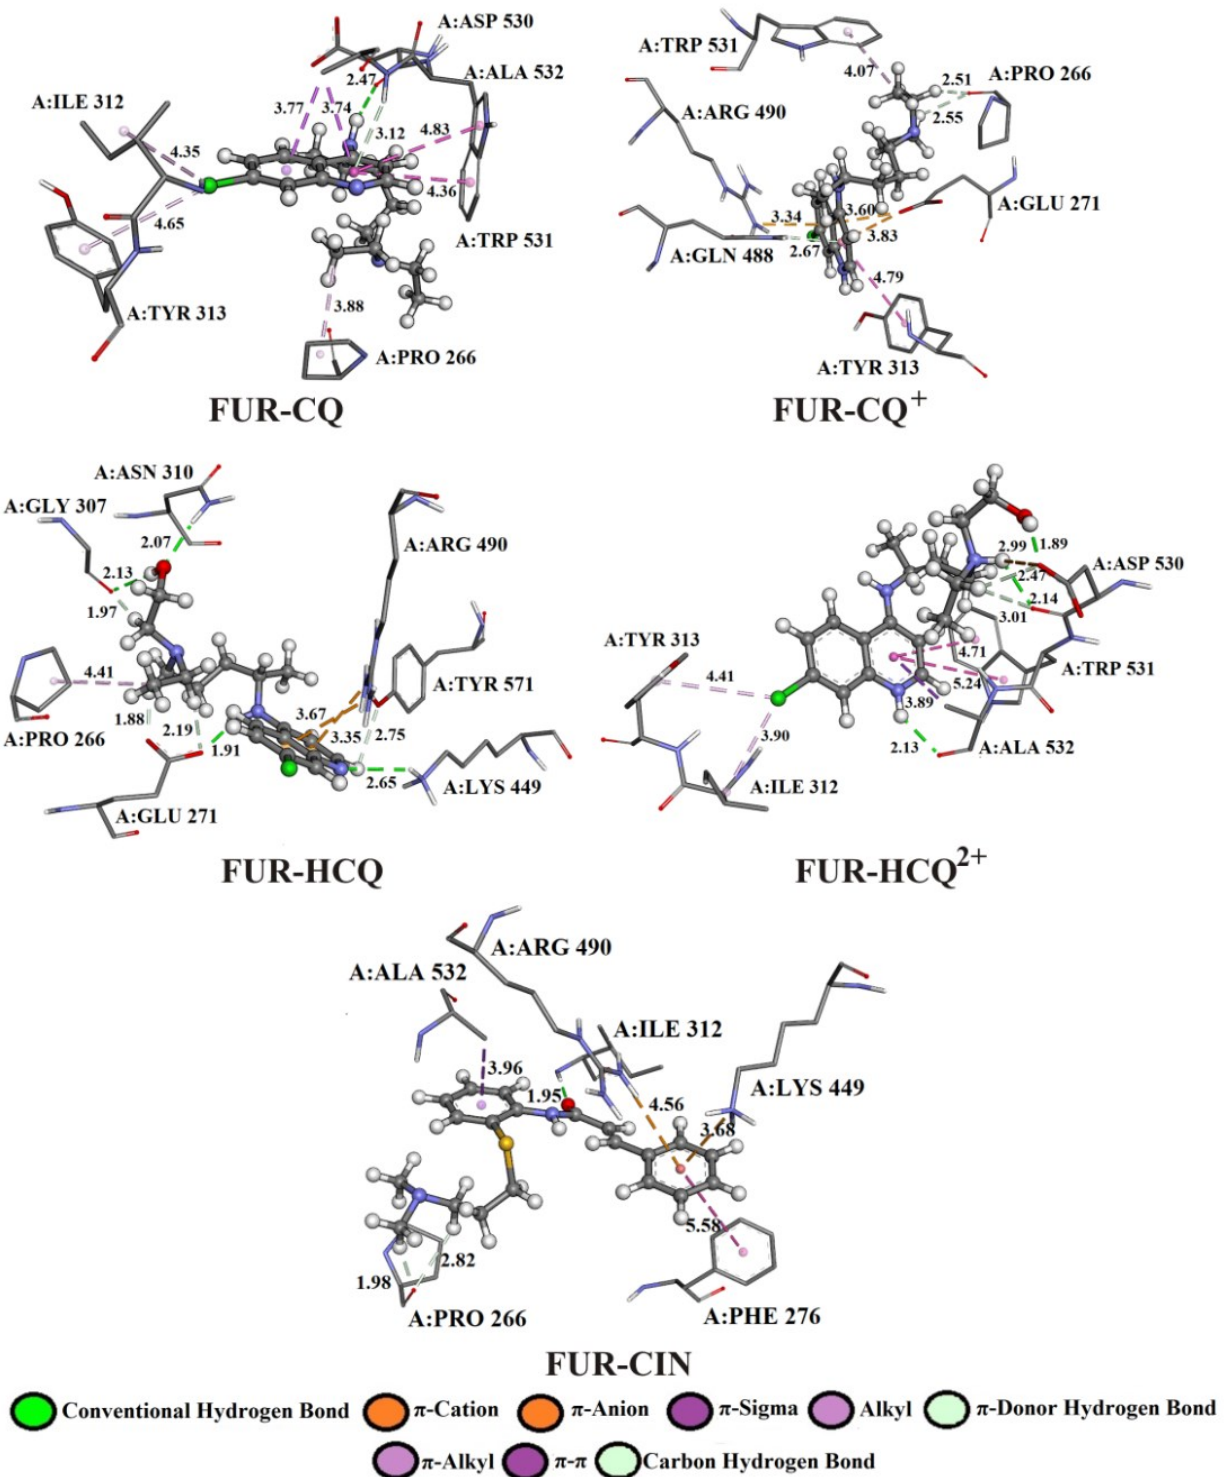

**Fig. S9** The best docking positions of different acid-base forms of CQ, HCQ, CIN to FUR enzyme

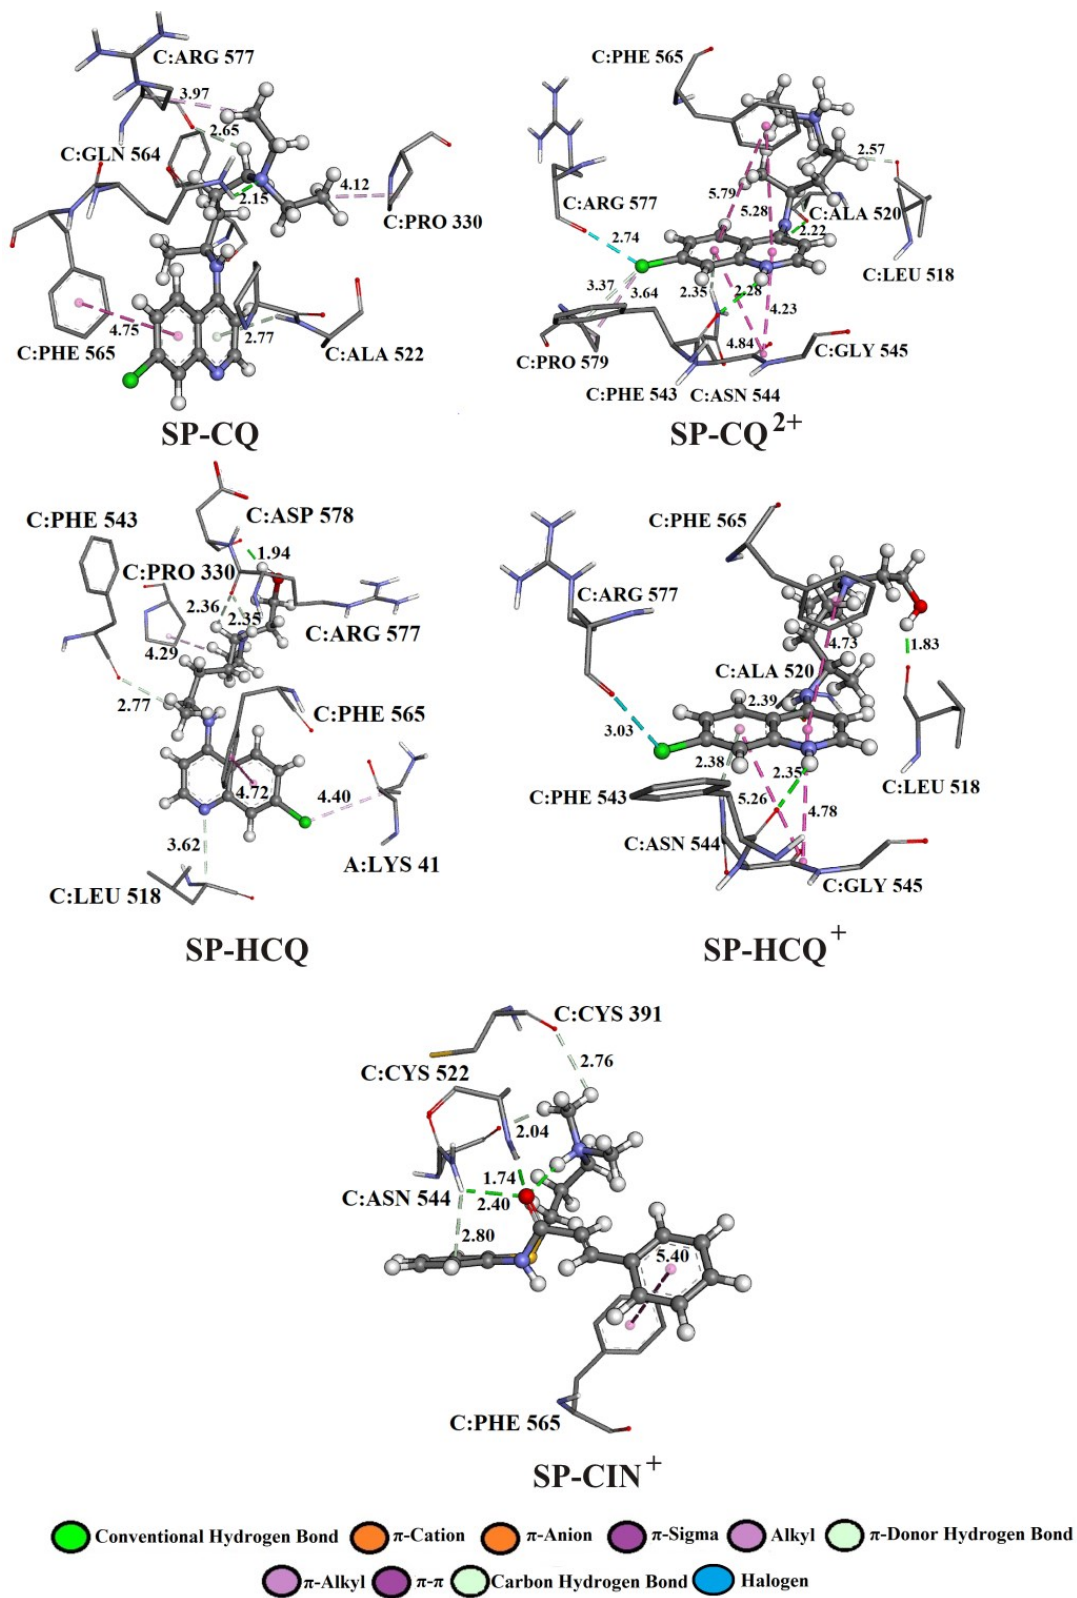

**Fig. S10** The best docking positions of different acid-base forms of CQ, HCQ, CIN to SP enzyme

**Table S2.** Types of interactions and distance (Å) between amino acids of respective active sites of **FUR**, **SP** and acid-base forms of **Q** and **BZF**

| FUR-Q                            |                            |      | SP-Q                              |                            |      |
|----------------------------------|----------------------------|------|-----------------------------------|----------------------------|------|
| Interactions:                    | Types of interactions:     | Å    | Interactions:                     | Types of interactions:     | Å    |
| A:ASN310:H – Q:O                 | Conventional Hydrogen Bond | 2.01 | Q:H - C:GLN1036:O                 | Conventional Hydrogen Bond | 2.93 |
| Q:H – A:TYR571:OH                | Conventional Hydrogen Bond | 2.25 | Q:H - C:GLN1036:O                 | Conventional Hydrogen Bond | 2.25 |
| Q:H – A:TYR571:OH                | Conventional Hydrogen Bond | 2.10 | Q:H - B:GLU1031:O                 | Conventional Hydrogen Bond | 1.94 |
| Q:H – A:GLY307:O                 | Conventional Hydrogen Bond | 2.33 | A:ARG1039:C - Q                   | $\pi$ - $\sigma$           | 3.29 |
| Q:H – A:ASP530:O                 | Conventional Hydrogen Bond | 2.19 | B:LYS1038:C,O;ARG1039:N - :Q      | Amide- $\pi$ Stacked       | 4.07 |
| A:ARG490:NH – Q                  | $\pi$ -Cation              | 3.28 | Q - A:LYS1038                     | $\pi$ -Alkyl               | 4.70 |
| A:GLU271:O – Q                   | $\pi$ -Anion               | 4.71 | Q - B:ARG1039                     | $\pi$ -Alkyl               | 4.45 |
| A:GLU271:O – Q                   | $\pi$ -Anion               | 4.02 | Q - B:LYS1038                     | $\pi$ -Alkyl               | 4.80 |
| A:ALA532:C – Q                   | $\pi$ - $\sigma$           | 3.88 | Q - B:LYS1038                     | $\pi$ -Alkyl               | 4.80 |
| A:ALA532:C – Q                   | $\pi$ - $\sigma$           | 3.45 | Q - B:LYS1038                     | $\pi$ -Alkyl               | 3.51 |
| A:TRP531 – Q                     | $\pi$ - $\pi$ -T-shaped    | 5.26 |                                   |                            |      |
| A:TRP531 – Q                     | $\pi$ - $\pi$ -T-shaped    | 4.79 |                                   |                            |      |
| FUR-Q <sup>-</sup>               |                            |      | SP-Q <sup>-</sup>                 |                            |      |
| A:ASN310:H - Q <sup>-</sup> :O   | Conventional Hydrogen Bond | 2.04 | B:LYS1038:H - Q <sup>-</sup> :O   | Conventional Hydrogen Bond | 2.42 |
| A:LYS449:H - Q <sup>-</sup> :O   | Conventional Hydrogen Bond | 2.61 |                                   |                            |      |
| Q <sup>-</sup> :H - A:TYR571:OH  | Conventional Hydrogen Bond | 2.13 | B:ARG1039:HN - Q <sup>-</sup> :O  | Conventional Hydrogen Bond | 2.77 |
| Q <sup>-</sup> :H - A:GLY307:O   | Conventional Hydrogen Bond | 2.31 |                                   |                            |      |
| Q <sup>-</sup> :H - A:ASP530:O   | Conventional Hydrogen Bond | 2.20 | Q <sup>-</sup> :H - B:GLU1031:O   | Conventional Hydrogen Bond | 2.24 |
| A:ARG490:NH - Q <sup>-</sup>     | $\pi$ -Cation              | 3.32 | B:GLY1035:C - Q <sup>-</sup> :O   | Carbon Hydrogen Bond       | 3.51 |
| A:GLU271:O - Q <sup>-</sup>      | $\pi$ -Anion               | 4.62 |                                   |                            |      |
| A:GLU271:O - Q <sup>-</sup>      | $\pi$ -Anion               | 3.95 | A:LYS1038:N - Q <sup>-</sup>      | $\pi$ -Cation              | 3.68 |
| A:ALA532:C - Q <sup>-</sup>      | $\pi$ - $\sigma$           | 3.94 |                                   |                            |      |
| A:ALA532:C - Q <sup>-</sup>      | $\pi$ - $\sigma$           | 3.46 | A:ARG1039:C - Q <sup>-</sup>      | $\pi$ - $\sigma$           | 3.25 |
| A:TYR313 - Q <sup>-</sup>        | $\pi$ - $\pi$ Stacked      | 5.47 |                                   |                            |      |
| A:TRP531 - Q <sup>-</sup>        | $\pi$ - $\pi$ Stacked      | 5.31 | B:SER1037:C - Q <sup>-</sup>      | $\pi$ - $\sigma$           | 3.28 |
| A:TRP531 - Q <sup>-</sup>        | $\pi$ - $\pi$ Stacked      | 4.83 |                                   |                            |      |
| FUR-Q <sup>2-</sup>              |                            |      | SP-Q <sup>2-</sup>                |                            |      |
| A:ALA532:HN - Q <sup>2-</sup> :O | Conventional Hydrogen Bond | 2.09 | B:GLN1036:HN - Q <sup>2-</sup> :O | Conventional Hydrogen Bond | 2.29 |
| Q <sup>2-</sup> :H - A:TYR313:OH | Conventional Hydrogen Bond | 1.80 | B:LYS1038:H - Q <sup>2-</sup> :O  | Conventional Hydrogen Bond | 2.30 |
| A:GLY307:CA - Q <sup>2-</sup> :O | Carbon Hydrogen Bond       | 3.05 | B:ARG1039:HN - Q <sup>2-</sup> :O | Conventional Hydrogen Bond | 2.78 |
| A:ARG490:NH - Q <sup>2-</sup>    | $\pi$ -Cation              | 3.83 | Q <sup>2-</sup> :H - B:GLU1031:O  | Conventional Hydrogen      | 2.22 |

|                                    |                            |             |                                          |                            |             |
|------------------------------------|----------------------------|-------------|------------------------------------------|----------------------------|-------------|
|                                    |                            |             |                                          | Bond                       |             |
| A:ARG490:NH - Q <sup>2-</sup>      | $\pi$ -Cation              | <b>3.02</b> | B:ARG1039:C - Q <sup>2-</sup> :O         | Carbon Hydrogen Bond       | <b>3.77</b> |
| A:GLU271:O - Q <sup>2-</sup>       | $\pi$ -Anion               | <b>3.69</b> |                                          |                            |             |
| A:GLU271:O - Q <sup>2-</sup>       | $\pi$ -Anion               | <b>4.18</b> | A:LYS1038:N - Q <sup>2-</sup>            | $\pi$ -Cation              | <b>3.56</b> |
| A:GLN488:H - Q <sup>2-</sup>       | $\pi$ -Donor Hydrogen Bond | <b>2.62</b> |                                          |                            |             |
| Q <sup>2-</sup> :H - A:TRP531      | $\pi$ -Donor Hydrogen Bond | <b>2.96</b> | A:ARG1039:C - Q <sup>2-</sup>            | $\pi$ - $\sigma$           | <b>3.24</b> |
| A:ALA532:CB - Q <sup>2-</sup>      | $\pi$ - $\sigma$           | <b>3.92</b> |                                          |                            |             |
| A:TRP531 - Q <sup>2-</sup>         | $\pi$ - $\pi$ - T-shaped   | <b>5.79</b> | B:SER1037:C - : Q <sup>2-</sup>          | $\pi$ - $\sigma$           | <b>3.25</b> |
| <b>FUR-BZF</b>                     |                            |             | <b>SP-BZF</b>                            |                            |             |
| A:GLY265:HN - BZF:O                | Conventional Hydrogen Bond | <b>2.90</b> | A:HIS1048:HN - BZF:O                     | Conventional Hydrogen Bond | <b>2.01</b> |
| A:ASN310:H - BZF:O                 | Conventional Hydrogen Bond | <b>1.84</b> | B:LYS1038:HN - BZF:O                     | Conventional Hydrogen Bond | <b>2.08</b> |
| A:ALA532:HN - BZF:O                | Conventional Hydrogen Bond | <b>1.88</b> | BZF:H - A:SER1037:O                      | Conventional Hydrogen Bond | <b>2.07</b> |
| BZF:H - A:PRO266:O                 | Conventional Hydrogen Bond | <b>2.85</b> | BZF:H - A:SER1037:O                      | Conventional Hydrogen Bond | <b>2.12</b> |
| BZF:H - A:PRO266:O                 | Conventional Hydrogen Bond | <b>2.21</b> | BZF:H - B:GLU1031:O                      | Conventional Hydrogen Bond | <b>1.89</b> |
| BZF:H - A:GLY307:O                 | Conventional Hydrogen Bond | <b>2.34</b> | B:GLY1035:C - BZF:O                      | Carbon Hydrogen Bond       | <b>3.20</b> |
| BZF:H - A:GLU271:O                 | Conventional Hydrogen Bond | <b>1.67</b> | A:LYS1038:O - BZF                        | $\pi$ -Lone Pair           | <b>2.83</b> |
| A:ILE312:HN - BZF                  | $\pi$ -Donor Hydrogen Bond | <b>3.26</b> | B:GLN1036:O - BZF                        | $\pi$ -Lone Pair           | <b>2.92</b> |
| A:TRP531 - BZF                     | $\pi$ - $\pi$ Stacked      | <b>4.71</b> | A:TYR1047 - BZF                          | $\pi$ - $\pi$ T-shaped     | <b>5.36</b> |
| <b>FUR-BZF<sup>-</sup></b>         |                            |             | <b>SP-BZF<sup>-</sup></b>                |                            |             |
| A:ASN310:H - BZF <sup>-</sup> :O   | Conventional Hydrogen Bond | <b>2.47</b> | C:GLN564:H - : BZF <sup>-</sup> :O       | Conventional Hydrogen Bond | <b>2.26</b> |
| A:ASN310:H - BZF <sup>-</sup> :O   | Conventional Hydrogen Bond | <b>2.49</b> | BZF <sup>-</sup> :H - C:ARG577:O         | Conventional Hydrogen Bond | <b>2.32</b> |
| A:ALA532:HN - BZF <sup>-</sup> :O  | Conventional Hydrogen Bond | <b>2.12</b> |                                          |                            |             |
| BZF <sup>-</sup> :H - A:GLU271:O   | Conventional Hydrogen Bond | <b>2.20</b> | BZF <sup>-</sup> :H - C:ALA520:O         | Conventional Hydrogen Bond | <b>2.37</b> |
| BZF <sup>-</sup> :H - A:GLU271:O   | Conventional Hydrogen Bond | <b>2.00</b> |                                          |                            |             |
| BZF <sup>-</sup> :H - A:GLY307:O   | Conventional Hydrogen Bond | <b>2.52</b> | C:PRO579:C - BZF <sup>-</sup> :O         | Carbon Hydrogen Bond       | <b>2.85</b> |
| BZF <sup>-</sup> :H - A:ASP530:O   | Conventional Hydrogen Bond | <b>2.24</b> |                                          |                            |             |
| A:GLY307:C - BZF <sup>-</sup> :O   | Carbon Hydrogen Bond       | <b>2.71</b> | C:PHE565 - BZF <sup>-</sup>              | $\pi$ - $\pi$ T-shaped     | <b>5.17</b> |
| A:GLU271:O - BZF <sup>-</sup>      | $\pi$ -Anion               | <b>4.56</b> |                                          |                            |             |
| A:TRP531 - BZF <sup>-</sup>        | $\pi$ - $\pi$ Stacked      | <b>5.77</b> |                                          |                            |             |
| A:TRP531 - BZF <sup>-</sup>        | $\pi$ - $\pi$ Stacked      | <b>4.51</b> | C:ASN544:C,O;GLY545:N - BZF <sup>-</sup> | Amide- $\pi$ Stacked       | <b>4.38</b> |
| <b>FUR-BZF<sup>2-</sup></b>        |                            |             | <b>SP-BZF<sup>2-</sup></b>               |                            |             |
| A:ASN310:H - BZF <sup>2-</sup> :O  | Conventional Hydrogen Bond | <b>1.80</b> | A:HIS1048:HN-BZF <sup>2-</sup> :O        | Conventional Hydrogen Bond | <b>2.02</b> |
| A:ILE312:HN - BZF <sup>2-</sup> :O | Conventional Hydrogen Bond | <b>2.00</b> | B:LYS1038:HN-BZF <sup>2-</sup> :O        | Conventional Hydrogen Bond | <b>2.16</b> |

|                                           |                            |             |                                           |                            |             |
|-------------------------------------------|----------------------------|-------------|-------------------------------------------|----------------------------|-------------|
| A:GLN488:H - <b>BZF</b> <sup>2-</sup> :O  | Conventional Hydrogen Bond | <b>1.76</b> | <b>BZF</b> <sup>2-</sup> :H - A:SER1037:O | Conventional Hydrogen Bond | <b>2.15</b> |
| A:ALA532:HN - <b>BZF</b> <sup>2-</sup> :O | Conventional Hydrogen Bond | <b>2.01</b> | <b>BZF</b> <sup>2-</sup> :H - B:GLU1031:O | Conventional Hydrogen Bond | <b>1.85</b> |
| <b>BZF</b> <sup>2-</sup> :H - A:ASN310:O  | Conventional Hydrogen Bond | <b>1.80</b> | B:GLY1035:C- <b>BZF</b> <sup>2-</sup> :O  | Carbon Hydrogen Bond       | <b>3.18</b> |
| <b>BZF</b> <sup>2-</sup> :H - A:ASP530:O  | Conventional Hydrogen Bond | <b>2.54</b> | A:ARG1039:C- <b>BZF</b> <sup>2-</sup>     | $\pi$ - $\sigma$           | <b>3.52</b> |
| A:GLY265:C - <b>BZF</b> <sup>2-</sup> :O  | Carbon Hydrogen Bond       | <b>3.73</b> | A:LYS1038:O- <b>BZF</b> <sup>2-</sup>     | $\pi$ -Lone Pair           | <b>2.80</b> |
| A:GLY307:C - <b>BZF</b> <sup>2-</sup> :O  | Carbon Hydrogen Bond       | <b>2.85</b> | B:GLN1036:O- <b>BZF</b> <sup>2-</sup>     | $\pi$ -Lone Pair           | <b>2.91</b> |
|                                           |                            |             | A:TYR1047- <b>BZF</b> <sup>2-</sup>       | $\pi$ - $\pi$ - T-shaped   | <b>5.35</b> |

**Table S3.** Types of interactions and distance (Å) between amino acids of respective active sites of **FUR**, **SP** and acid-base forms of **CQ**, **HCQ**, and **CIN**

| <b>FUR-CQ</b>                          |                            |             | <b>SP-CQ</b>                           |                            |             |
|----------------------------------------|----------------------------|-------------|----------------------------------------|----------------------------|-------------|
| Interactions:                          | Types of interactions:     | Å           | Interactions:                          | Types of interactions:     | Å           |
| <b>CQ</b> :H - A:ASP530:O              | Conventional Hydrogen Bond | <b>2.47</b> | C:GLN564:H - <b>CQ</b> :N              | Conventional Hydrogen Bond | <b>2.15</b> |
| A:ALA532:HN - <b>CQ</b>                | $\pi$ -Donor Hydrogen Bond | <b>3.12</b> |                                        |                            |             |
| A:ALA532:C - <b>CQ</b>                 | $\pi$ - $\sigma$           | <b>3.74</b> | C:ALA522:HN - <b>CQ</b>                | $\pi$ -Donor Hydrogen Bond | <b>2.77</b> |
| A:ALA532:C - <b>CQ</b>                 | $\pi$ - $\sigma$           | <b>3.77</b> |                                        |                            |             |
| A:TRP531 - <b>CQ</b>                   | $\pi$ - $\pi$ - T-shaped   | <b>4.83</b> | C:PHE565 - <b>CQ</b>                   | $\pi$ - $\pi$ - T-shaped   | <b>4.75</b> |
| A:TRP531 - <b>CQ</b>                   | $\pi$ - $\pi$ - T-shaped   | <b>4.36</b> |                                        |                            |             |
| <b>CQ</b> :Cl - A:ILE312               | Alkyl                      | <b>4.35</b> | <b>CQ</b> :C - C:PRO330                | Alkyl                      | <b>4.12</b> |
| <b>CQ</b> :C - A:PRO266                | Alkyl                      | <b>3.88</b> |                                        |                            |             |
| A:TYR313 - <b>CQ</b> :Cl               | $\pi$ -Alkyl               | <b>4.65</b> | <b>CQ</b> :C - C:ARG577                | Alkyl                      | <b>3.97</b> |
| <b>FUR-CQ<sup>+</sup></b>              |                            |             | <b>SP-CQ<sup>+</sup></b>               |                            |             |
| A:ARG490:NH - <b>CQ<sup>+</sup></b>    | $\pi$ -Cation              | <b>3.34</b> | <b>CQ<sup>+</sup></b> :H - C:PHE543:O  | Conventional Hydrogen Bond | <b>2.19</b> |
| A:GLU271:O - <b>CQ<sup>+</sup></b>     | $\pi$ -Anion               | <b>3.60</b> | <b>CQ<sup>+</sup></b> :H - C:ALA520:O  | Conventional Hydrogen Bond | <b>2.11</b> |
| A:GLU271:O - <b>CQ<sup>+</sup></b>     | $\pi$ -Anion               | <b>3.83</b> | C:PRO579:C - <b>CQ<sup>+</sup></b> :CL | Carbon Hydrogen Bond       | <b>3.73</b> |
| A:GLN488:H - <b>CQ<sup>+</sup></b>     | $\pi$ -Donor Hydrogen Bond | <b>2.67</b> | C:ARG577:O - <b>CQ<sup>+</sup></b> :CL | Halogen (Cl, Br, I)        | <b>2.78</b> |
| A:TYR313 - <b>CQ<sup>+</sup></b>       | $\pi$ - $\pi$ Stacked      | <b>4.79</b> | C:ASN544:H - <b>CQ<sup>+</sup></b>     | $\pi$ -Donor Hydrogen Bond | <b>2.49</b> |
| <b>CQ<sup>+</sup></b> :H - A:PRO266:O  | Carbon Hydrogen Bond       | <b>2.51</b> | C:PHE565 - <b>CQ<sup>+</sup></b>       | $\pi$ - $\pi$ - T-shaped   | <b>5.56</b> |
| <b>CQ<sup>+</sup></b> :H - A:PRO266:O  | Carbon Hydrogen Bond       | <b>2.55</b> | C:PHE565 - <b>CQ<sup>+</sup></b>       | $\pi$ - $\pi$ - T-shaped   | <b>5.27</b> |
| A:TRP531 - <b>CQ<sup>+</sup></b> :C    | $\pi$ -Alkyl               | <b>4.07</b> | <b>CQ<sup>+</sup></b> :CL - C:PRO579   | Alkyl                      | <b>3.93</b> |
| <b>FUR-CQ<sup>2+</sup></b>             |                            |             | <b>SP-CQ<sup>2+</sup></b>              |                            |             |
| <b>CQ<sup>2+</sup></b> :N - A:GLU271:O | Attractive Charge          | <b>4.47</b> | <b>CQ<sup>2+</sup></b> :H - C:ALA520:O | Conventional Hydrogen Bond | <b>2.22</b> |
| <b>CQ<sup>2+</sup></b> :H - A:GLU271:O | Conventional Hydrogen Bond | <b>2.12</b> | <b>CQ<sup>2+</sup></b> :H - C:PHE543:O | Conventional Hydrogen Bond | <b>2.28</b> |
| <b>CQ<sup>2+</sup></b> :H - A:PRO266:O | Conventional Hydrogen Bond | <b>1.95</b> | C:PRO579:C- <b>CQ<sup>2+</sup></b> :CL | Carbon Hydrogen Bond       | <b>3.37</b> |

|                                   |                                |      |                                           |                            |      |
|-----------------------------------|--------------------------------|------|-------------------------------------------|----------------------------|------|
| CQ <sup>2+</sup> :H - A:GLU271:O  | Carbon Hydrogen Bond           | 2.48 | C:ARG577:O - CQ <sup>2+</sup> :CL         | Halogen (Cl, Br, I)        | 2.74 |
|                                   |                                |      | C:ASN544:H - CQ <sup>2+</sup>             | $\pi$ -Donor Hydrogen Bond | 2.35 |
| A:ARG490:NH - CQ <sup>2+</sup>    | $\pi$ -Cation                  | 3.89 | C:PHE565 - CQ <sup>2+</sup>               | $\pi$ - $\pi$ - T-shaped   | 5.79 |
|                                   |                                |      | C:PHE565 - CQ <sup>2+</sup>               | $\pi$ - $\pi$ - T-shaped   | 5.28 |
| A:ARG490:NH - CQ <sup>2+</sup>    | $\pi$ -Cation                  | 4.17 | C:ASN544:C,O;GLY 545:N - CQ <sup>2+</sup> | Amide- $\pi$ Stacked       | 4.84 |
|                                   |                                |      | C:ASN544:C,O;GLY 545:N - CQ <sup>2+</sup> | Amide- $\pi$ Stacked       | 4.23 |
| A:GLN488:H - CQ <sup>2+</sup>     | Pi-Donor Hydrogen Bond         | 2.88 | CQ <sup>2+</sup> :CL - C:PRO579           | Alkyl                      | 3.64 |
| <b>FUR-HCQ</b>                    |                                |      | <b>SP-HCQ</b>                             |                            |      |
| A:ASN310:H - HCQ:O                | Conventional Hydrogen Bond     | 2.07 | HCQ:H - C:ASP578:O                        | Conventional Hydrogen Bond | 1.94 |
| A:LYS449:H - HCQ:N                | Conventional Hydrogen Bond     | 2.65 | C:LEU518:C - HCQ:N                        | Carbon Hydrogen Bond       | 3.62 |
| : HCQ:H - A:GLU271:O              | Conventional Hydrogen Bond     | 1.91 | HCQ:H - C:ARG577:O                        | Carbon Hydrogen Bond       | 2.36 |
| HCQ:H - A:GLY307:O                | Conventional Hydrogen Bond     | 2.13 | HCQ:H - C:ARG577:O                        | Carbon Hydrogen Bond       | 2.35 |
| HCQ:H - A:GLU271:O                | Carbon Hydrogen Bond           | 2.19 | HCQ:H - C:PHE543:O                        | Carbon Hydrogen Bond       | 2.77 |
| HCQ:H - A:GLY307:O                | Carbon Hydrogen Bond           | 1.97 | C:PHE565 - HCQ                            | $\pi$ - $\pi$ - T-shaped   | 4.72 |
| HCQ:H - A:TYR571:OH               | Carbon Hydrogen Bond           | 2.75 | HCQ:CL - A:LYS41                          | Alkyl                      | 4.40 |
| A:ARG490:NH - HCQ                 | $\pi$ -Cation                  | 3.35 |                                           |                            |      |
| A:ARG490:NH - HCQ                 | $\pi$ -Cation                  | 3.67 | HCQ:C - C:PRO330                          | Alkyl                      | 4.29 |
| HCQ:C - A:PRO266                  | Alkyl                          | 4.41 |                                           |                            |      |
| <b>FUR-HCQ<sup>+</sup></b>        |                                |      | <b>SP-HCQ<sup>+</sup></b>                 |                            |      |
| A:ALA532:HN - HCQ <sup>+</sup> :O | Conventional Hydrogen Bond     | 1.65 | HCQ <sup>+</sup> :H - C:ALA520:O          | Conventional Hydrogen Bond | 2.39 |
| HCQ <sup>+</sup> :H - A:GLU271:O  | Conventional Hydrogen Bond     | 2.48 | HCQ <sup>+</sup> :H - C:PHE543:O          | Conventional Hydrogen Bond | 2.35 |
| HCQ <sup>+</sup> :H - A:ASP530:O  | Conventional Hydrogen Bond     | 2.11 | HCQ <sup>+</sup> :H - C:LEU518:O          | Conventional Hydrogen Bond | 1.83 |
| HCQ <sup>+</sup> :C - A:GLY307:O  | Carbon Hydrogen Bond           | 2.40 | C:ARG577:O - HCQ <sup>+</sup> :CL         | Halogen (Cl, Br, I)        | 3.03 |
| A:ARG490:NH - HCQ <sup>+</sup>    | $\pi$ -Cation                  | 3.81 | C:ASN544:H - HCQ <sup>+</sup>             | $\pi$ -Donor Hydrogen Bond | 2.38 |
| A:ARG490:NH - HCQ <sup>+</sup>    | $\pi$ -Cation                  | 4.10 | C:PHE565 - HCQ <sup>+</sup>               | $\pi$ - $\pi$ -T-shaped    | 4.73 |
| A:GLN488:H - HCQ <sup>+</sup>     | $\pi$ -Donor Hydrogen Bond     | 2.72 | C:ASN544:C,O;GLY 545:N - HCQ <sup>+</sup> | Amide- $\pi$ Stacked       | 5.26 |
| HCQ <sup>+</sup> :C - A:PRO266    | Alkyl                          | 3.94 | C:ASN544:C,O;GLY 545:N - HCQ <sup>+</sup> | Amide- $\pi$ Stacked       | 4.78 |
| <b>FUR-HCQ<sup>2+</sup></b>       |                                |      | <b>SP-HCQ<sup>2+</sup></b>                |                            |      |
| HCQ <sup>2+</sup> :H - A:ASP530:O | Salt Bridge; Attractive Charge | 2.99 | C:GLN564:H - HCQ <sup>2+</sup> :O         | Conventional Hydrogen Bond | 2.07 |
| HCQ <sup>2+</sup> :H - A:ALA532:O | Conventional Hydrogen Bond     | 2.13 | HCQ <sup>2+</sup> :H - C:ARG577:O         | Conventional Hydrogen Bond | 2.02 |

|                                        |                            |             |                                         |                            |             |
|----------------------------------------|----------------------------|-------------|-----------------------------------------|----------------------------|-------------|
| <b>HCQ<sup>2+</sup>:H</b> - A:ASP530:O | Conventional Hydrogen Bond | <b>2.14</b> | <b>HCQ<sup>2+</sup>:C</b> - C:ASN544:O  | Carbon Hydrogen Bond       | <b>2.06</b> |
| <b>HCQ<sup>2+</sup>:H</b> - A:ASP530:O | Conventional Hydrogen Bond | <b>1.89</b> | C:PHE565 - <b>HCQ<sup>2+</sup></b>      | $\pi$ - $\pi$ -T-shaped    | <b>4.63</b> |
| A:ALA532:C - <b>HCQ<sup>2+</sup></b>   | $\pi$ - $\sigma$           | <b>3.89</b> | <b>HCQ<sup>2+</sup>:CL</b> - A:LYS41    | Alkyl                      | <b>3.93</b> |
| A:TRP531 - <b>HCQ<sup>2+</sup></b>     | $\pi$ - $\pi$ -T-shaped    | <b>5.24</b> | <b>HCQ<sup>2+</sup></b> - C:LEU518      | $\pi$ -Alkyl               | <b>4.32</b> |
| A:TRP531 - <b>HCQ<sup>2+</sup></b>     | $\pi$ - $\pi$ -T-shaped    | <b>4.71</b> | <b>HCQ<sup>2+</sup>:H</b> - C:ARG577:O  | Carbon Hydrogen Bond       | <b>2.35</b> |
| <b>HCQ<sup>2+</sup>:Cl</b> - A:ILE312  | Alkyl                      | <b>3.89</b> | <b>HCQ<sup>2+</sup>:H</b> - C:PHE543:O  | Carbon Hydrogen Bond       | <b>2.85</b> |
| A:TYR313 - <b>HCQ<sup>2+</sup>:Cl</b>  | $\pi$ -Alkyl               | <b>4.41</b> |                                         |                            |             |
| <b>FUR-CIN</b>                         |                            |             | <b>SP-CIN</b>                           |                            |             |
| A:ILE312:HN - <b>CIN</b> :O            | Conventional Hydrogen Bond | <b>1.95</b> | C:ALA522:HN - <b>CIN</b> :O             | Conventional Hydrogen Bond | <b>1.85</b> |
| <b>CIN</b> :C - A:PRO266:O             | Carbon Hydrogen Bond       | <b>2.99</b> | C:ASN544:H - <b>CIN</b> :O              | Conventional Hydrogen Bond | <b>2.34</b> |
| A:LYS449:N - <b>CIN</b>                | $\pi$ -Cation              | <b>3.68</b> | <b>CIN</b> :H - C:ASN544:O              | Carbon Hydrogen Bond       | <b>2.25</b> |
| A:ARG490:NH - <b>CIN</b>               | $\pi$ -Cation              | <b>4.56</b> | <b>CIN</b> :H - C:CYS391:O              | Carbon Hydrogen Bond       | <b>2.71</b> |
| A:ALA532:C - <b>CIN</b>                | $\pi$ - $\sigma$           | <b>3.96</b> | C:ASN544:H - <b>CIN</b>                 | $\pi$ -Donor Hydrogen Bond | <b>2.79</b> |
| A:PHE275 - <b>CIN</b>                  | $\pi$ - $\pi$ -T-shaped    | <b>5.58</b> | C:PHE565 - <b>CIN</b>                   | $\pi$ - $\pi$ -T-shaped    | <b>5.37</b> |
|                                        |                            |             | <b>CIN</b> - C:PRO579                   | $\pi$ -Alkyl               | <b>4.62</b> |
| <b>FUR-CIN<sup>+</sup></b>             |                            |             | <b>SP-CIN<sup>+</sup></b>               |                            |             |
| <b>CIN<sup>+</sup>:N</b> - A:ASP530:O  | Attractive Charge          | <b>5.14</b> | C:ALA522:HN - <b>CIN<sup>+</sup>:O</b>  | Conventional Hydrogen Bond | <b>1.74</b> |
| A:GLN488:H - <b>CIN<sup>+</sup>:O</b>  | Conventional Hydrogen Bond | <b>1.85</b> | C:ASN544:H - :UNL1:O                    | Conventional Hydrogen Bond | <b>2.40</b> |
| A:ARG490:H - <b>CIN<sup>+</sup>:O</b>  | Conventional Hydrogen Bond | <b>2.80</b> | <b>CIN<sup>+</sup>:H21</b> - C:ASN544:O | Carbon Hydrogen Bond       | <b>2.04</b> |
| A:TYR571:H - <b>CIN<sup>+</sup>:O</b>  | Conventional Hydrogen Bond | <b>2.55</b> | <b>CIN<sup>+</sup>:H22</b> - C:CYS391:O | Carbon Hydrogen Bond       | <b>2.76</b> |
| <b>CIN<sup>+</sup>:H</b> - A:GLU271:O  | Conventional Hydrogen Bond | <b>1.78</b> | C:ASN544:H - <b>CIN<sup>+</sup></b>     | $\pi$ -Donor Hydrogen Bond | <b>2.80</b> |
| <b>CIN<sup>+</sup>:H</b> - A:ASP530:O  | Conventional Hydrogen Bond | <b>1.93</b> | C:PHE565 - <b>CIN<sup>+</sup></b>       | $\pi$ - $\pi$ -T-shaped    | <b>5.40</b> |
| <b>CIN<sup>+</sup>:H</b> - A:ASN529:O  | Carbon Hydrogen Bond       | <b>2.93</b> | C:PHE565 - <b>CIN<sup>+</sup></b>       | $\pi$ - $\pi$ -T-shaped    | <b>5.40</b> |
| <b>CIN<sup>+</sup>:H</b> - A:ASP530:O  | Carbon Hydrogen Bond       | <b>2.60</b> |                                         |                            |             |
| A:LYS449:H - <b>CIN<sup>+</sup></b>    | $\pi$ -Cation              | <b>2.55</b> | C:PHE565 - <b>CIN<sup>+</sup></b>       | $\pi$ - $\pi$ -T-shaped    | <b>5.40</b> |
| <b>CIN<sup>+</sup>:N</b> - A:TRP531    | $\pi$ -Cation              | <b>4.87</b> |                                         |                            |             |

## Cartesian coordinates

### Q

0 1

|   |             |             |             |
|---|-------------|-------------|-------------|
| C | 2.19420800  | -1.43626600 | -0.51847200 |
| C | 1.83418800  | -0.16655900 | -0.05577900 |
| C | 2.83142300  | 0.71781300  | 0.37665300  |
| C | 4.15989300  | 0.33761100  | 0.33396400  |
| C | 4.51560000  | -0.92978800 | -0.14199100 |
| C | 3.53038900  | -1.81150700 | -0.56328300 |
| C | 0.41808100  | 0.21549700  | -0.02784400 |
| C | -0.09307800 | 1.46912500  | -0.12619100 |
| C | -1.52338700 | 1.69670300  | -0.12685700 |
| C | -2.35437900 | 0.52867100  | -0.02381500 |
| C | -1.75668000 | -0.73531900 | 0.07389500  |
| O | -0.40792500 | -0.86237800 | 0.07617300  |
| C | -3.77009300 | 0.59911700  | -0.01942400 |
| C | -4.52716000 | -0.55000900 | 0.08234700  |
| C | -3.88033200 | -1.78866800 | 0.18161800  |
| C | -2.49610100 | -1.90278700 | 0.17917700  |
| O | -4.39809000 | 1.79086500  | -0.11334100 |
| O | -4.59124500 | -2.93870800 | 0.28432400  |
| O | -1.96050200 | 2.86178700  | -0.23141800 |
| O | 0.69671300  | 2.56786300  | -0.26205500 |
| O | 5.84925400  | -1.21355200 | -0.14838400 |
| H | 2.58938700  | 1.69721300  | 0.76612800  |
| H | 1.43497500  | -2.12956800 | -0.85589600 |
| H | 0.09884700  | 3.32688300  | -0.36540400 |
| H | -2.01003000 | -2.86597600 | 0.25787400  |
| H | -5.60936100 | -0.49087100 | 0.08417200  |
| H | 6.00145900  | -2.10720800 | -0.48200100 |
| H | -3.71690200 | 2.49180300  | -0.17931100 |
| H | -5.53794100 | -2.74596700 | 0.28314900  |
| H | 3.82056100  | -2.79074800 | -0.92830100 |
| O | 5.11740700  | 1.21301400  | 0.76839500  |
| H | 5.98867400  | 0.80150400  | 0.68604700  |

### Q

-1 1

|   |            |             |             |
|---|------------|-------------|-------------|
| C | 2.22420400 | -1.47329600 | -0.47382100 |
| C | 1.86330900 | -0.18311500 | -0.05772000 |
| C | 2.88759600 | 0.70873200  | 0.33604500  |



|   |             |             |             |
|---|-------------|-------------|-------------|
| C | 4.19700500  | 0.30361700  | 0.29704600  |
| C | 4.59997300  | -1.00092600 | -0.13527000 |
| C | 3.55218600  | -1.86973100 | -0.51850500 |
| C | 0.46215400  | 0.20403300  | -0.03250700 |
| C | -0.05611200 | 1.46495300  | -0.11445500 |
| C | -1.47367000 | 1.69820800  | -0.10806800 |
| C | -2.31594800 | 0.53403800  | -0.01589500 |
| C | -1.72653100 | -0.73309100 | 0.05950200  |
| O | -0.37841800 | -0.86694800 | 0.05870100  |
| C | -3.72927200 | 0.61410000  | -0.00615200 |
| C | -4.49522700 | -0.53129500 | 0.08301800  |
| C | -3.85674000 | -1.77519600 | 0.16106700  |
| C | -2.47352300 | -1.89819100 | 0.14841400  |
| O | -4.34719400 | 1.81360400  | -0.08389000 |
| O | -4.57605200 | -2.92303500 | 0.25458900  |
| O | -1.91617000 | 2.86870300  | -0.20295700 |
| O | 0.74270200  | 2.56506900  | -0.25078100 |
| O | 5.85694800  | -1.29572100 | -0.14552800 |
| H | 2.65882400  | 1.70480800  | 0.69087600  |
| H | 1.45430000  | -2.17057500 | -0.78176000 |
| H | 0.14462200  | 3.32411200  | -0.34802700 |
| H | -1.99327600 | -2.86550200 | 0.21139900  |
| H | -5.57693900 | -0.46393200 | 0.09062400  |
| H | -3.65355700 | 2.50501700  | -0.14868800 |
| H | -5.52080800 | -2.72185500 | 0.26553200  |
| H | 3.81250000  | -2.86782100 | -0.85474100 |
| O | 5.20495200  | 1.15523000  | 0.69004200  |
| H | 6.02377700  | 0.64349400  | 0.57717500  |

Q<sup>2</sup>-

-2 1

|   |             |             |             |
|---|-------------|-------------|-------------|
| C | 2.21822400  | -1.46022800 | -0.50096600 |
| C | 1.83748900  | -0.18545800 | -0.06195300 |
| C | 2.84649900  | 0.71108700  | 0.35450200  |
| C | 4.16307900  | 0.32522300  | 0.31300400  |
| C | 4.58648000  | -0.96301800 | -0.14233200 |
| C | 3.55400000  | -1.83779000 | -0.54609700 |
| C | 0.42699400  | 0.18606300  | -0.03599500 |
| C | -0.10241800 | 1.43546300  | -0.12329400 |
| C | -1.53098200 | 1.65386900  | -0.11435900 |
| C | -2.35339000 | 0.49675000  | -0.01622000 |
| C | -1.76050400 | -0.77934600 | 0.06605900  |
| O | -0.40111000 | -0.89674400 | 0.06348800  |

|   |             |             |             |
|---|-------------|-------------|-------------|
| C | -3.77648200 | 0.55096500  | -0.00290500 |
| C | -4.52947400 | -0.58916200 | 0.09369000  |
| C | -3.91703500 | -1.88619200 | 0.18367200  |
| C | -2.49180200 | -1.94134000 | 0.16129700  |
| O | -4.39748400 | 1.76120500  | -0.08796200 |
| O | -4.62793900 | -2.94623200 | 0.28117600  |
| O | -1.96890300 | 2.83384600  | -0.21298300 |
| O | 0.67884100  | 2.55054000  | -0.26779100 |
| O | 5.85166200  | -1.23889700 | -0.15234800 |
| H | 2.60104700  | 1.69694500  | 0.72733700  |
| H | 1.45947500  | -2.16234500 | -0.82572000 |
| H | 0.06054400  | 3.29392700  | -0.36443100 |
| H | -1.98652400 | -2.89708500 | 0.22791100  |
| H | -5.61127000 | -0.51832600 | 0.10324200  |
| H | -3.69978500 | 2.44704900  | -0.15638700 |
| H | 3.82932500  | -2.82613600 | -0.89920900 |
| O | 5.15747100  | 1.18391000  | 0.72753800  |
| H | 5.98280400  | 0.68363100  | 0.60969800  |

## **BZF**

0 1

|   |             |             |             |
|---|-------------|-------------|-------------|
| C | -1.77310300 | 0.29215800  | -0.85374100 |
| C | -1.84577400 | 0.36857800  | 0.54095100  |
| C | -2.52532400 | -0.58325900 | -1.59683900 |
| C | -2.72287300 | -0.47117400 | 1.24479800  |
| C | -3.39760300 | -1.40611900 | -0.86429100 |
| C | -3.50703700 | -1.36056100 | 0.53195000  |
| O | -0.83760600 | 1.14409400  | -1.37980700 |
| C | -0.31056300 | 1.95487200  | -0.32004300 |
| C | -0.88910800 | 1.33763900  | 0.98357300  |
| C | 1.24026000  | 1.96758500  | -0.42739700 |
| C | 2.03612600  | 0.74223200  | -0.25446300 |
| C | 3.66578900  | -1.49298200 | 0.08484700  |
| C | 4.23787000  | -0.23317600 | -0.05187500 |
| C | 2.27130700  | -1.63782100 | 0.05220700  |
| C | 3.42899900  | 0.87659900  | -0.22390400 |
| C | 1.46274200  | -0.53054200 | -0.11233700 |
| O | 1.74197300  | 3.05071300  | -0.65098300 |
| O | -0.57390700 | 1.69812200  | 2.10070000  |
| O | 4.46589900  | -2.57323200 | 0.24657300  |
| O | -0.79820300 | 3.24363500  | -0.40883000 |
| O | -4.18925200 | -2.30447000 | -1.48802600 |

|   |             |             |             |
|---|-------------|-------------|-------------|
| O | -2.81406500 | -0.43303300 | 2.58829800  |
| O | 1.80763400  | -2.91533600 | 0.18773000  |
| H | -2.45782700 | -0.64735400 | -2.67549700 |
| H | -4.19626900 | -2.02248000 | 1.04025600  |
| H | 5.31699000  | -0.14380200 | -0.02120200 |
| H | 3.87282500  | 1.85828300  | -0.32906900 |
| H | 0.39427700  | -0.70243800 | -0.14088400 |
| H | 3.92374600  | -3.37150100 | 0.32654700  |
| H | -0.09610100 | 3.79895000  | -0.78927400 |
| H | -4.05108600 | -2.28240800 | -2.44487700 |
| H | -2.20070700 | 0.22380800  | 2.95133400  |
| H | 0.84413400  | -2.93917300 | 0.11682300  |

### **BZF-**

-1 1

|   |             |             |             |
|---|-------------|-------------|-------------|
| C | -1.79734400 | 0.24003600  | -0.88851000 |
| C | -1.86152100 | 0.34380800  | 0.51707800  |
| C | -2.50918900 | -0.65962500 | -1.61585600 |
| C | -2.71901500 | -0.52995000 | 1.22816800  |
| C | -3.39637100 | -1.55095100 | -0.89837900 |
| C | -3.46647400 | -1.44772700 | 0.54243100  |
| O | -0.87922800 | 1.12574100  | -1.41597200 |
| C | -0.37636400 | 1.94390300  | -0.35585100 |
| C | -0.94862000 | 1.32249200  | 0.94720400  |
| C | 1.17259300  | 1.97797800  | -0.43746500 |
| C | 1.98148000  | 0.75964800  | -0.25355000 |
| C | 3.63238300  | -1.45396800 | 0.12477900  |
| C | 4.18342300  | -0.17853000 | 0.08594000  |
| C | 2.24896900  | -1.62519800 | -0.02632200 |
| C | 3.36392500  | 0.92066400  | -0.10636100 |
| C | 1.42901400  | -0.52944900 | -0.21165400 |
| O | 1.67387800  | 3.06773400  | -0.63452400 |
| O | -0.63470500 | 1.71891300  | 2.07000600  |
| O | 4.44158600  | -2.52503200 | 0.30994000  |
| O | -0.87681700 | 3.23227100  | -0.45767100 |
| O | -4.09519700 | -2.40526800 | -1.51872500 |
| O | -2.79311900 | -0.45153100 | 2.58341600  |
| O | 1.80706500  | -2.91735600 | 0.01981300  |
| H | -2.43390300 | -0.72638500 | -2.69367600 |
| H | -4.12963500 | -2.11945400 | 1.07465700  |
| H | 5.25392100  | -0.06771800 | 0.21037900  |
| H | 3.79038500  | 1.91518300  | -0.13325200 |
| H | 0.37050300  | -0.71840700 | -0.33605900 |

|   |             |             |             |
|---|-------------|-------------|-------------|
| H | 3.91120400  | -3.33514100 | 0.31342700  |
| H | -0.17374000 | 3.79450300  | -0.82351100 |
| H | -2.20360900 | 0.24893100  | 2.90169200  |
| H | 0.84583900  | -2.95406500 | -0.07382500 |

**BZF<sup>2-</sup>**

-2 1

|   |             |             |             |
|---|-------------|-------------|-------------|
| C | -1.82450500 | 0.31469000  | -0.84505500 |
| C | -1.79465400 | 0.34708300  | 0.56622700  |
| C | -2.58308100 | -0.54016900 | -1.57453300 |
| C | -2.61413300 | -0.56262900 | 1.28198000  |
| C | -3.43207500 | -1.46532900 | -0.85069100 |
| C | -3.40835600 | -1.43840900 | 0.59531900  |
| O | -0.93246000 | 1.22280600  | -1.38695000 |
| C | -0.34797200 | 1.97239700  | -0.32229600 |
| C | -0.86217800 | 1.30880500  | 0.98739400  |
| C | 1.18237800  | 1.91344000  | -0.50895900 |
| C | 1.95060800  | 0.62963900  | -0.29193600 |
| C | 3.68034200  | -1.57038500 | 0.16016500  |
| C | 4.19608600  | -0.20799300 | 0.27978900  |
| C | 2.19034000  | -1.71803200 | -0.20066200 |
| C | 3.36865500  | 0.81893300  | 0.05879200  |
| C | 1.36816900  | -0.58641100 | -0.44122500 |
| O | 1.77823300  | 2.90961400  | -0.81931500 |
| O | -0.47872900 | 1.66355600  | 2.10150700  |
| O | 4.29592000  | -2.59242100 | 0.31241100  |
| O | -0.77419200 | 3.28445500  | -0.32643300 |
| O | -4.17232000 | -2.28124600 | -1.46973000 |
| O | -2.60469100 | -0.56575000 | 2.64032000  |
| O | 1.72569300  | -2.88531700 | -0.27160000 |
| H | -2.57337900 | -0.54854000 | -2.65670800 |
| H | -4.03929900 | -2.13698300 | 1.13194800  |
| H | 5.23930200  | -0.08507500 | 0.54124000  |
| H | 3.71856100  | 1.84039000  | 0.13596500  |
| H | 0.33967200  | -0.75768900 | -0.72863200 |
| H | -0.21830600 | 3.80126400  | -0.93022600 |
| H | -1.99567300 | 0.11225800  | 2.96860100  |
| H | 2.41173900  | -3.56497600 | -0.06973500 |

**CQ**

0 1

|   |            |            |            |
|---|------------|------------|------------|
| C | 2.82501400 | 0.16372000 | 0.24687300 |
|---|------------|------------|------------|

|    |             |             |             |
|----|-------------|-------------|-------------|
| C  | 1.45938900  | 0.25185600  | 0.71153700  |
| C  | 3.56475100  | -1.00576800 | 0.56253000  |
| N  | 0.71990300  | 1.35747800  | 0.47893600  |
| C  | 4.90814800  | -1.10965700 | 0.11949700  |
| C  | 3.44932300  | 1.18607800  | -0.50685800 |
| N  | 3.05979100  | -2.05657500 | 1.27438200  |
| C  | 5.46623000  | -0.09327400 | -0.60319100 |
| C  | 0.97020700  | -0.84393300 | 1.42018100  |
| C  | 4.74886100  | 1.07180000  | -0.93163900 |
| C  | 1.80555000  | -1.93787000 | 1.66579100  |
| N  | -5.19534000 | -0.56346400 | -0.30570300 |
| Cl | 7.12471200  | -0.22979700 | -1.14678900 |
| C  | -0.70254200 | 1.47949800  | 0.79899400  |
| C  | -3.00229100 | 0.47965600  | 0.29745700  |
| C  | -3.77045800 | -0.44653700 | -0.63815700 |
| C  | -5.75073000 | -1.73692700 | -0.99323700 |
| C  | -5.92095400 | 0.66331900  | -0.69427800 |
| C  | -1.55886200 | 0.65425200  | -0.16889500 |
| C  | -1.06815200 | 2.95667700  | 0.77403600  |
| C  | -7.21179900 | -2.00932000 | -0.67217900 |
| C  | -6.90810300 | 1.14652600  | 0.35961700  |
| H  | 1.11058300  | 2.09543600  | -0.08753900 |
| H  | 5.46899800  | -2.00281400 | 0.36587000  |
| H  | 2.91167100  | 2.08796000  | -0.77395100 |
| H  | -0.04443700 | -0.87125200 | 1.79203200  |
| H  | 5.21823300  | 1.85834100  | -1.50834100 |
| H  | 1.39887600  | -2.77428800 | 2.22782500  |
| H  | -0.84757800 | 1.10047500  | 1.81582100  |
| H  | -3.49994300 | 1.45190300  | 0.35946300  |
| H  | -3.00920500 | 0.05218700  | 1.30662600  |
| H  | -3.64429600 | -0.10722600 | -1.68120200 |
| H  | -3.32627800 | -1.44401000 | -0.57611100 |
| H  | -5.15514300 | -2.60457600 | -0.69917500 |
| H  | -5.63626900 | -1.62276500 | -2.08526900 |
| H  | -6.43751200 | 0.50059900  | -1.65064900 |
| H  | -5.19641700 | 1.45955900  | -0.87740500 |
| H  | -1.10504900 | -0.33503900 | -0.29235800 |
| H  | -1.53533200 | 1.14093200  | -1.15115700 |
| H  | -0.46948900 | 3.51879400  | 1.49344200  |
| H  | -2.12064300 | 3.09489300  | 1.02284400  |
| H  | -0.89531200 | 3.37026300  | -0.22443800 |
| H  | -7.36384600 | -2.12134600 | 0.40436000  |
| H  | -7.52124800 | -2.93734900 | -1.15845900 |
| H  | -7.86641700 | -1.21327200 | -1.03252400 |

|   |             |            |            |
|---|-------------|------------|------------|
| H | -7.65323400 | 0.38441600 | 0.59442400 |
| H | -7.43150500 | 2.03942500 | 0.00703100 |
| H | -6.38127400 | 1.40264400 | 1.28248300 |

CQ+

1 1

|    |             |             |             |
|----|-------------|-------------|-------------|
| C  | 2.81888600  | 0.16858600  | 0.19129600  |
| C  | 1.42511800  | 0.23207100  | 0.59803800  |
| C  | 3.56643000  | -0.97981900 | 0.51088900  |
| N  | 0.69903000  | 1.31600100  | 0.36191400  |
| C  | 4.92009700  | -1.09502200 | 0.15154100  |
| C  | 3.46775800  | 1.20269600  | -0.51714400 |
| N  | 2.96537100  | -2.01547800 | 1.18269600  |
| C  | 5.50204900  | -0.05830400 | -0.53002500 |
| C  | 0.88152100  | -0.89435300 | 1.25850600  |
| C  | 4.78864300  | 1.10038500  | -0.87703800 |
| C  | 1.67465900  | -1.97518700 | 1.53323000  |
| N  | -5.22949600 | -0.54033700 | -0.35119900 |
| Cl | 7.17757500  | -0.17532400 | -0.98955700 |
| C  | -0.72527500 | 1.46701600  | 0.69274300  |
| C  | -3.01513200 | 0.46668600  | 0.21355300  |
| C  | -3.85103100 | -0.31041500 | -0.79615500 |
| C  | -5.84191200 | -1.58171700 | -1.18576200 |
| C  | -6.01669500 | 0.70884500  | -0.40970900 |
| C  | -1.59671200 | 0.69367700  | -0.30351900 |
| C  | -1.04587300 | 2.95364900  | 0.71540400  |
| C  | -7.24341300 | -1.97336700 | -0.74453700 |
| C  | -6.84466700 | 0.96235200  | 0.84236200  |
| H  | 1.13051100  | 2.10246700  | -0.10612400 |
| H  | 5.47207100  | -1.99007300 | 0.41398100  |
| H  | 2.93374300  | 2.10015100  | -0.80357900 |
| H  | -0.15226100 | -0.92560300 | 1.56788800  |
| H  | 5.27739200  | 1.89777800  | -1.42144700 |
| H  | 1.29613600  | -2.84799300 | 2.04866200  |
| H  | -0.87187500 | 1.05831900  | 1.69671500  |
| H  | -3.49089700 | 1.42519800  | 0.44061600  |
| H  | -2.97002600 | -0.09939900 | 1.15066200  |
| H  | -3.83791500 | 0.21301500  | -1.76807100 |
| H  | -3.38210600 | -1.28555500 | -0.95589200 |
| H  | -5.19629700 | -2.46232300 | -1.14333900 |
| H  | -5.87122800 | -1.25424800 | -2.23948600 |
| H  | -6.66715400 | 0.69545600  | -1.29466800 |
| H  | -5.33654600 | 1.55160100  | -0.55153600 |

|   |             |             |             |
|---|-------------|-------------|-------------|
| H | -1.13619800 | -0.27799900 | -0.51106100 |
| H | -1.61728700 | 1.24677200  | -1.24942600 |
| H | -0.44278300 | 3.47262700  | 1.46266600  |
| H | -2.09780700 | 3.10625900  | 0.95753000  |
| H | -0.85208700 | 3.39650300  | -0.26598400 |
| H | -7.24776000 | -2.30296300 | 0.29756700  |
| H | -7.60181300 | -2.79822800 | -1.36471800 |
| H | -7.95175300 | -1.14872100 | -0.84810400 |
| H | -7.54248900 | 0.14515200  | 1.03500900  |
| H | -7.41974200 | 1.88628600  | 0.73676300  |
| H | -6.19263600 | 1.06432300  | 1.71387900  |
| H | 3.51897200  | -2.83626900 | 1.40805400  |

## CQ<sup>2+</sup>

2 1

|    |             |             |             |
|----|-------------|-------------|-------------|
| C  | 2.83316100  | 0.16335000  | 0.19917400  |
| C  | 1.44072400  | 0.21940000  | 0.61105500  |
| C  | 3.58695100  | -0.98281800 | 0.51229900  |
| N  | 0.70930500  | 1.30116700  | 0.37692400  |
| C  | 4.93928300  | -1.09213100 | 0.14618300  |
| C  | 3.47516100  | 1.20203400  | -0.50908100 |
| N  | 2.99317900  | -2.02245400 | 1.18437500  |
| C  | 5.51430200  | -0.05123400 | -0.53483400 |
| C  | 0.90552300  | -0.90962800 | 1.27265400  |
| C  | 4.79477800  | 1.10585800  | -0.87484900 |
| C  | 1.70459800  | -1.98794200 | 1.54167100  |
| N  | -5.21081000 | -0.52576000 | -0.43298200 |
| Cl | 7.18776400  | -0.16050000 | -1.00266600 |
| C  | -0.71546700 | 1.44934200  | 0.70328300  |
| C  | -3.01826100 | 0.52021400  | 0.15139000  |
| C  | -3.78633800 | -0.31872500 | -0.85514100 |
| C  | -5.85850100 | -1.62790000 | -1.22291200 |
| C  | -6.01464100 | 0.75883100  | -0.47940000 |
| C  | -1.57231900 | 0.68485000  | -0.31190300 |
| C  | -1.03556400 | 2.93583700  | 0.74093300  |
| C  | -7.20476600 | -2.01453300 | -0.64576700 |
| C  | -6.56442500 | 1.10895400  | 0.88709100  |
| H  | 1.13708200  | 2.08864400  | -0.09289400 |
| H  | 5.49571700  | -1.98593300 | 0.40347900  |
| H  | 2.93702600  | 2.09839500  | -0.79097200 |
| H  | -0.12605100 | -0.94608300 | 1.58836900  |
| H  | 5.27804800  | 1.90696200  | -1.41870300 |
| H  | 1.33230000  | -2.86298100 | 2.05787600  |

|   |             |             |             |
|---|-------------|-------------|-------------|
| H | -0.87056200 | 1.02819100  | 1.70063800  |
| H | -3.49018900 | 1.49766100  | 0.27799700  |
| H | -3.03584600 | 0.01558100  | 1.12430000  |
| H | -3.81966300 | 0.14802400  | -1.84155700 |
| H | -3.33705300 | -1.30820700 | -0.94648800 |
| H | -5.16951700 | -2.47140300 | -1.19597400 |
| H | -5.93369100 | -1.26379800 | -2.24843200 |
| H | -6.80855400 | 0.61360500  | -1.20988600 |
| H | -5.35587900 | 1.53899700  | -0.85583900 |
| H | -1.13868200 | -0.30640000 | -0.47802700 |
| H | -1.53976100 | 1.21722600  | -1.26861200 |
| H | -0.41750900 | 3.44640200  | 1.48160100  |
| H | -2.08172600 | 3.09122400  | 1.00476200  |
| H | -0.85740500 | 3.38603600  | -0.24001200 |
| H | -7.10308700 | -2.32382600 | 0.39713500  |
| H | -7.59349800 | -2.85983200 | -1.21527700 |
| H | -7.93209000 | -1.20363300 | -0.70652100 |
| H | -7.22798600 | 0.32330100  | 1.25510000  |
| H | -7.13204700 | 2.03781400  | 0.81875400  |
| H | -5.75333500 | 1.25080700  | 1.60531800  |
| H | 3.55105100  | -2.84166900 | 1.40529800  |
| H | -5.18599000 | -0.83984000 | 0.54459200  |

## HCQ

0 1

|    |             |             |             |
|----|-------------|-------------|-------------|
| C  | 3.11371000  | 0.17868100  | 0.23924200  |
| C  | 1.72867500  | 0.27953300  | 0.63811600  |
| C  | 3.84911000  | -0.96180200 | 0.65506900  |
| N  | 0.98377300  | 1.34867000  | 0.27658400  |
| C  | 5.20629100  | -1.08500100 | 0.26194700  |
| C  | 3.76449500  | 1.16816900  | -0.53546500 |
| N  | 3.32823500  | -1.96252300 | 1.42516500  |
| C  | 5.78549000  | -0.10707400 | -0.49650400 |
| C  | 1.23109600  | -0.75382100 | 1.42868600  |
| C  | 5.07922900  | 1.03927600  | -0.90524600 |
| C  | 2.06614400  | -1.81891800 | 1.78108700  |
| N  | -4.88638500 | -0.73223200 | -0.49129500 |
| Cl | 7.46136200  | -0.26655500 | -0.97728300 |
| C  | -0.45089100 | 1.47800700  | 0.53462700  |
| C  | -2.74238300 | 0.47867200  | 0.00554500  |
| C  | -3.46487900 | -0.57611500 | -0.82265800 |
| C  | -5.43729200 | -1.86526800 | -1.24829200 |
| C  | -5.62716200 | 0.50696600  | -0.78087100 |



|   |             |             |             |
|---|-------------|-------------|-------------|
| C | -1.26434900 | 0.54909400  | -0.37399800 |
| C | -0.83127000 | 2.94097000  | 0.35501000  |
| C | -6.80387400 | -2.31334700 | -0.75400900 |
| C | -5.99536900 | 1.30658300  | 0.45186600  |
| H | 1.35687200  | 1.98096600  | -0.41699000 |
| H | 5.76195900  | -1.96007700 | 0.57600400  |
| H | 3.23827600  | 2.06196500  | -0.84840100 |
| H | 0.20587300  | -0.76083400 | 1.77176200  |
| H | 5.57038000  | 1.80224900  | -1.49529200 |
| H | 1.64987700  | -2.61145000 | 2.39696400  |
| H | -0.62359000 | 1.19777800  | 1.57850600  |
| H | -3.20813300 | 1.45670600  | -0.14272800 |
| H | -2.83678900 | 0.23272100  | 1.06993400  |
| H | -3.34894900 | -0.33163000 | -1.89394700 |
| H | -2.97732900 | -1.54140900 | -0.66030700 |
| H | -4.73661300 | -2.69727000 | -1.14660000 |
| H | -5.48825700 | -1.62201300 | -2.32286200 |
| H | -6.55604600 | 0.26963600  | -1.30559300 |
| H | -5.04918500 | 1.15125200  | -1.45646000 |
| H | -0.83466400 | -0.45712100 | -0.32874500 |
| H | -1.15716100 | 0.89772100  | -1.40794500 |
| H | -0.23681500 | 3.57894300  | 1.01189900  |
| H | -1.88455500 | 3.09665600  | 0.58926900  |
| H | -0.66049300 | 3.25033000  | -0.68102500 |
| H | -6.75946800 | -2.59389200 | 0.30111900  |
| H | -7.13300900 | -3.18444400 | -1.32566300 |
| H | -7.56176200 | -1.53599800 | -0.86931900 |
| H | -6.36846200 | 2.28939800  | 0.14333800  |
| H | -5.12403800 | 1.45066900  | 1.09678300  |
| O | -7.01532900 | 0.60057400  | 1.16357900  |
| H | -7.17842600 | 1.06096500  | 1.99339000  |

## HCQ+

1 1

|   |            |             |             |
|---|------------|-------------|-------------|
| C | 3.11567700 | 0.16588700  | 0.20177400  |
| C | 1.72594700 | 0.20969400  | 0.62687800  |
| C | 3.91828400 | -0.91295400 | 0.61661700  |
| N | 0.95055200 | 1.23394900  | 0.29922000  |
| C | 5.26975200 | -1.00578100 | 0.24292200  |
| C | 3.70776200 | 1.15128800  | -0.61708000 |
| N | 3.37477400 | -1.90184800 | 1.39884100  |
| C | 5.79553600 | -0.01689700 | -0.54712800 |
| C | 1.24454100 | -0.86783900 | 1.40629600  |

|    |             |             |             |
|----|-------------|-------------|-------------|
| C  | 5.02623600  | 1.07046600  | -0.99098500 |
| C  | 2.08906900  | -1.88123800 | 1.76987000  |
| N  | -4.95499800 | -0.67889300 | -0.54864800 |
| Cl | 7.46727900  | -0.10674700 | -1.02510600 |
| C  | -0.47898900 | 1.36176600  | 0.61933800  |
| C  | -2.78711600 | 0.44250900  | 0.03674500  |
| C  | -3.53071300 | -0.53141000 | -0.86876100 |
| C  | -5.53747800 | -1.72906300 | -1.39549900 |
| C  | -5.66641700 | 0.59787300  | -0.72934500 |
| C  | -1.30780000 | 0.49993700  | -0.33763400 |
| C  | -0.84331400 | 2.83739700  | 0.55389600  |
| C  | -6.90524400 | -2.19155900 | -0.91814700 |
| C  | -6.01896100 | 1.29207500  | 0.57002500  |
| H  | 1.34238400  | 1.98486400  | -0.25408100 |
| H  | 5.86392700  | -1.84790100 | 0.57821200  |
| H  | 3.13264700  | 1.99417500  | -0.97944000 |
| H  | 0.21816500  | -0.91257200 | 1.73679300  |
| H  | 5.47010800  | 1.83005400  | -1.62106900 |
| H  | 1.75781900  | -2.71433700 | 2.37555800  |
| H  | -0.61973700 | 1.00896900  | 1.64447300  |
| H  | -3.22634000 | 1.44010600  | -0.04546700 |
| H  | -2.89186100 | 0.12475200  | 1.08060400  |
| H  | -3.40651300 | -0.20863900 | -1.91818200 |
| H  | -3.06553900 | -1.51708200 | -0.77864200 |
| H  | -4.85326300 | -2.58060200 | -1.38098600 |
| H  | -5.59923500 | -1.38789200 | -2.44233500 |
| H  | -6.59901900 | 0.42751500  | -1.27341200 |
| H  | -5.07251200 | 1.28495500  | -1.34613800 |
| H  | -0.89911700 | -0.51616200 | -0.34517200 |
| H  | -1.19104200 | 0.90137000  | -1.35076600 |
| H  | -0.20849900 | 3.42302800  | 1.22153300  |
| H  | -1.88014200 | 2.98453600  | 0.85586400  |
| H  | -0.72348300 | 3.21306600  | -0.46660800 |
| H  | -6.84327100 | -2.59045900 | 0.09717400  |
| H  | -7.27815800 | -2.98122900 | -1.57471300 |
| H  | -7.63821600 | -1.38225000 | -0.92178800 |
| H  | -6.36730600 | 2.30783000  | 0.35326200  |
| H  | -5.14582300 | 1.35391400  | 1.22570000  |
| O  | -7.05786300 | 0.54832500  | 1.21264800  |
| H  | -7.21613500 | 0.93621100  | 2.07974100  |
| H  | 3.96641500  | -2.67345500 | 1.69091800  |

HCQ<sup>2+</sup>

2 1

|    |             |             |             |
|----|-------------|-------------|-------------|
| C  | 3.11198000  | 0.16860400  | 0.19531200  |
| C  | 1.71488500  | 0.24658700  | 0.58733900  |
| C  | 3.86792100  | -0.94708900 | 0.60014500  |
| N  | 0.98034000  | 1.30123800  | 0.25917900  |
| C  | 5.22472300  | -1.07450300 | 0.25820200  |
| C  | 3.75593300  | 1.15592800  | -0.58111400 |
| N  | 3.27209200  | -1.93789600 | 1.34085000  |
| C  | 5.80210900  | -0.08268500 | -0.49085100 |
| C  | 1.18025800  | -0.82918000 | 1.33270900  |
| C  | 5.08040700  | 1.04138100  | -0.92375100 |
| C  | 1.98129000  | -1.88070200 | 1.68787100  |
| N  | -4.92780000 | -0.57201400 | -0.65267700 |
| Cl | 7.48217500  | -0.21444800 | -0.92884200 |
| C  | -0.45172400 | 1.46795200  | 0.54318100  |
| C  | -2.75644100 | 0.56615400  | -0.05179200 |
| C  | -3.49041500 | -0.34106000 | -1.02312300 |
| C  | -5.55493600 | -1.56447200 | -1.59643100 |
| C  | -5.72020600 | 0.70785300  | -0.57145100 |
| C  | -1.27894000 | 0.62704800  | -0.43490600 |
| C  | -0.77195100 | 2.95309400  | 0.46259000  |
| C  | -6.82150500 | -2.16609300 | -1.02404100 |
| C  | -5.91998500 | 1.14092800  | 0.86243600  |
| H  | 1.41213100  | 2.05287300  | -0.26248800 |
| H  | 5.78242400  | -1.94414000 | 0.58601300  |
| H  | 3.21734900  | 2.02691100  | -0.93348400 |
| H  | 0.14722700  | -0.84321700 | 1.64541600  |
| H  | 5.56599100  | 1.80272600  | -1.52000700 |
| H  | 1.60910600  | -2.71524300 | 2.26732800  |
| H  | -0.62947200 | 1.12024500  | 1.56449700  |
| H  | -3.18833100 | 1.56893600  | -0.06857100 |
| H  | -2.85800400 | 0.17221200  | 0.96590200  |
| H  | -3.50110600 | 0.07441700  | -2.03305300 |
| H  | -3.02323700 | -1.32628300 | -1.05007800 |
| H  | -4.80802200 | -2.33831500 | -1.76808500 |
| H  | -5.72904100 | -1.02873200 | -2.53068100 |
| H  | -6.68901100 | 0.53078400  | -1.03589000 |
| H  | -5.19403500 | 1.46802900  | -1.14763900 |
| H  | -0.87687100 | -0.39046200 | -0.46488000 |
| H  | -1.16676700 | 1.05069300  | -1.43898800 |
| H  | -0.15058500 | 3.52006600  | 1.15814900  |
| H  | -1.81640000 | 3.13239300  | 0.71702400  |
| H  | -0.59485000 | 3.32294500  | -0.55155600 |
| H  | -6.61598900 | -2.66058200 | -0.07197700 |

|   |             |             |             |
|---|-------------|-------------|-------------|
| H | -7.19157400 | -2.91574800 | -1.72497800 |
| H | -7.60915600 | -1.42660800 | -0.87624500 |
| H | -6.49320200 | 2.07199100  | 0.85708600  |
| H | -4.96609000 | 1.31856900  | 1.36433000  |
| O | -6.63627900 | 0.09943000  | 1.51795300  |
| H | -6.61908200 | 0.26507900  | 2.46675200  |
| H | 3.83129700  | -2.73633800 | 1.62526600  |
| H | -4.94428600 | -1.00079200 | 0.28210400  |
